# Supplementary material for: Synthesis of platinum-containing oligomers utilizing ADMET chemistry and polycondensation of a bisimide with α,ω-dibromoalkanes: examination of triplet–triplet annihilation upconversion
Source: Royal Society of Chemistry journal article supplement (doi:10.1039/d3py01254a), 2024-01-01
Supplement: d3py01254a1.pdf [file d3py01254a1.pdf]

Supplementary Information

**Synthesis of platinum-containing oligomers utilizing ADMET chemistry and polycondensation of a bisimide with  $\alpha,\omega$ -dibromoalkanes: examination of triplet–triplet annihilation upconversion**

Taichi Sotani,<sup>a</sup> Naoki Shimada,<sup>a</sup> Toshiko Mizokuro,<sup>b</sup> Hiromitsu Sogawa,<sup>a</sup> Kenneth. B. Wagener,<sup>c</sup> Fumio Sanda\*<sup>a</sup>

<sup>a</sup>Department of Chemistry and Materials Engineering, Faculty of Chemistry, Materials and Bioengineering, Kansai University, 3-3-35 Yamate-cho, Suita, Osaka 564-8680, Japan. E-mail: sanda@kansai-u.ac.jp

<sup>b</sup>National Institute of Advanced Industrial Science and Technology (AIST), 1-1-1 Higashi, Tsukuba, Ibaraki 305-8565, Japan

<sup>c</sup>Department of Chemistry, University of Florida, PO Box 117200, Gainesville FL 32611, USA

\*Corresponding Author. E-mail: [sanda@kansai-u.ac.jp](mailto:sanda@kansai-u.ac.jp).

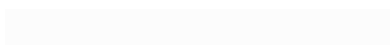

## Experimental section

### Measurements

$^1\text{H}$  (400 MHz),  $^{13}\text{C}$  (100 MHz) and  $^{31}\text{P}$  NMR (162 MHz) spectra were recorded on JEOL ECS-400 and ECZ-400 spectrometers in  $\text{CDCl}_3$  and  $\text{DMSO-}d_6$  with TMS as an internal standard. IR absorption spectra were measured on a JASCO FT/IR-4100 spectrophotometer. Mass spectra were measured on a Bruker Compact QToF mass spectrometer using an atmospheric pressure chemical ionization (APCI) probe under the following conditions: solvent, THF/*i*-PrOH; mass range ( $m/z$ ) < 2000; mode, negative. Elemental analysis was performed at the analytical center, Faculty of Engineering, Osaka University. Number-average molecular weight ( $M_n$ ) and dispersity ( $D$ ) values of oligomers were determined by a size exclusion chromatography (SEC) system consisting of JASCO RI-4030, UV-4075, PU4180, DG-2080-53, CO-4060, AS-2055 Plus and LC-Net II/AD, equipped with Shodex polystyrene gel columns KF-805L  $\times$  3, using THF as an eluent at a flow rate of 1.0 mL/min, calibrated using polystyrene standards at 40 °C. All absorption and emission spectra were measured in a quartz cell (optical path length: 1 cm). UV–vis absorption spectra were recorded on a JASCO V-630 and V-780 spectrometer. In the polarized case, a Glan-Taylor prism was introduced into the spectrophotometer's optical path. Photoluminescence and excitation spectra were recorded on a Hitachi F-7000 excited at 430 nm. Sample solutions of photoluminescence spectra were stirred for 1 h under  $\text{N}_2$  in a glove box to remove dissolved oxygen. Absolute quantum yields of fluorescence and phosphorescence were recorded in a quartz cell on a Hamamatsu Photonics C11347. Fluorescence lifetimes were recorded on a Hamamatsu Photonics C11367-01 excited at 405 nm and monitored at 500 nm. Phosphorescence lifetimes were recorded on a Hamamatsu Photonics C11367-01 excited at 450 nm using a Xe flash lamp (C11567-02, 60 W), monitored at 640 nm, and equipped with a bandpass

filter at 450 nm (Edmund, FWHM: 10 nm, OD4). TTA–UC spectra were measured according to the following procedure: Sample solutions of a sensitizer ( $c = 5 \mu\text{M}$ ) and 9,10-diphenylanthracene as an emitter ( $c = 60 \mu\text{M}$ , Tokyo Chemical Industry Co., D4401) were stirred more than 1 h in a  $\text{N}_2$  atmosphere-controlled glove box to remove dissolved oxygen. The UC spectra were recorded using a 450 nm CW laser (450 nm, 4.5 mW, CPS450, THORLABS) as an excitation source on an Ocean photonics FLAME-S equipped with a notch filter at 457 nm. UC emission lifetimes were recorded on a Hamamatsu Photonics C11367-01 excited at 450 nm using a Xe flash lamp (C11567-2, 60 W), monitored at 410 nm, and equipped with an ND filter (5%) and a bandpass filter at 450 nm (Edmund, FWHM: 10 nm, OD4) for excitation light, and a short pass filter at 430 nm (Asahi Spectra, SV0430) for emission. Phosphorescence lifetimes of solutions were recorded in a similar manner to the UC emission lifetimes monitored at 640 nm and equipped with a long pass filter (Optosigma, SCF-50S-48Y). The UC quantum yields were determined using 4-(dicyanomethylene)-2-methyl-6-(4-dimethylaminostyryl)-4H-pyran ( $\Phi_F = 34\%$  in methanol, Exciton) as a standard in the following equation:

$$\eta_{\text{UC}} = 2\Phi_{\text{std}} \left( \frac{A_{\text{std}}}{A_{\text{unk}}} \right) \left( \frac{I_{\text{unk}}}{I_{\text{std}}} \right) \left( \frac{\eta_{\text{unk}}}{\eta_{\text{std}}} \right)^2$$

where  $\Phi_{\text{std}}$  is the quantum yield of fluorescence of the standard,  $\eta_{\text{UC}}$ ,  $A_{\text{unk}}$ ,  $I_{\text{unk}}$  and  $\eta_{\text{unk}}$  represent the quantum efficiency, absorbance, integrated photoluminescence intensity and refractive index of the sample. The terms for the subscript std represent the reference values.<sup>S1</sup> The emission spectra of the films were recorded in a flow cell on the Ocean

photonics FLAME-S equipped with the notch filter using the 450 nm CW laser as the excitation source. TGA was measured on a SHIMADZU thermogravimetric analyzer TGA-50. DSC was measured on a SEIKO DSC 6200 differential scanning calorimeter under N<sub>2</sub>. XRD was measured on a Rigaku Smart Lab. X-ray diffractometer (CuK $\alpha$ 1 for X-ray source).

## **Materials**

All solvents for the reaction were degassed by Ar bubbling and desiccated with molecular sieve 4A. All other reagents were commercially obtained and used as received without purification.

## **Synthesis of monomer 1**

### **4-Bromo-1,8-naphthalimide<sup>S2</sup>**

To a dispersion of 4-bromo-1,8-naphthalic anhydride (8.31 g, 30.0 mmol) in ethanol (240 mL), 30% aqueous ammonia (60 mL) was added. The resulting mixture was heated with refluxing overnight. After cooling the resulting solution, the solid was filtered, washed with ethanol, and dried to obtain the title compound as a beige solid (7.18 g, 26.0 mmol) in 87% yield. <sup>1</sup>H NMR (400 MHz, DMSO-*d*<sub>6</sub>):  $\delta$  7.93–8.05 (Ar, 1H), 8.16–8.34 (Ar, 1H), 8.44–8.55 (Ar, 1H), 11.87 (s, 1H, NH) ppm.

### ***N*-(5-Hexenyl)-4-bromo-1,8-naphthalimide**

A mixture of 4-bromo-1,8-naphthalimide (1.38 g, 5.0 mmol), 6-bromo-1-hexene (0.82 g, 5.0 mmol), K<sub>2</sub>CO<sub>3</sub> (0.97 g, 7.0 mmol) and DMF (10.0 mL) was stirred at 90 °C overnight,

then concentrated to obtain a brown solid. It was purified by silica gel column chromatography eluted with  $\text{CHCl}_3$  to obtain the title compound as slightly a yellow solid (1.59 g) in 88% yield.  $^1\text{H}$  NMR (400 MHz,  $\text{CDCl}_3$ ):  $\delta$  1.51–1.57 (m, 2H,  $-\text{CH}_2-$ ), 1.71–1.81 (m, 2H,  $-\text{CH}_2-$ ), 2.10–2.18 (m, 2H,  $-\text{CH}_2-\text{CH}=\text{}$ ), 4.15–4.20 (m, 2H,  $-\text{NCH}_2-$ ), 4.93–5.04 (m, 2H,  $=\text{CH}_2$ ), 5.76–5.87 (m, 1H,  $-\text{CH}=\text{}$ ), 7.82–7.87 (1H, Ar), 8.04 (1H, Ar), 8.42 (1H, Ar), 8.56–8.58 (1H, Ar), 8.63–8.67 (1H, Ar) ppm.  $^{13}\text{C}$  NMR (100 MHz,  $\text{CDCl}_3$ ):  $\delta$  26.3, 27.5, 33.4, 40.4, 114.7, 122.2, 123.0, 128.0, 128.9, 130.2, 130.5, 131.0, 131.2, 132.0, 133.2, 138.5, 163.5 ppm.

#### ***N*-(5-Hexenyl)-4-[2-(trimethylsilyl)ethynyl]-1,8-naphthalimide**

*N*-(5-Hexenyl)-4-bromo-1,8-naphthalimide (1.43 g, 4.0 mmol),  $\text{PdCl}_2(\text{PPh}_3)_2$  (28.1 mg, 0.04 mmol),  $\text{CuI}$  (7.6 mg, 0.04 mmol) and 2-(dicyclohexylphosphino)-2',4',6'-triisopropyl-1,1'-biphenyl (XPhos, 19.1 mg, 0.04 mmol) were dissolved in a solution of THF (4 mL) and  $\text{Et}_3\text{N}$  (1 mL) under Ar. Trimethylsilylacetylene (TMSA, 0.59 g, 0.85 mL, 6.0 mmol) was added to the resulting mixture, and heated with refluxing overnight.  $\text{CH}_2\text{Cl}_2$  (50 mL) was added to the mixture, and the mixture was washed with 1.0 M  $\text{NH}_4\text{Cl}$  aq. The organic layer was separated from the water layer, dried over anhydrous  $\text{MgSO}_4$ , and concentrated. The residual mass was purified by silica gel column chromatography eluted with  $\text{CH}_2\text{Cl}_2$  to obtain the title compound as a yellow solid (1.49 g, 3.9 mmol) quantitatively.  $^1\text{H}$  NMR (400 MHz,  $\text{CDCl}_3$ ):  $\delta$  0.35 (s, 9H,  $-\text{Si}(\text{CH}_3)_3$ ), 1.49–1.57 (m, 2H,  $-\text{CH}_2-$ ), 1.71–1.79 (m, 2H,  $-\text{CH}_2-$ ), 2.10–2.17 (m, 2H,  $-\text{CH}_2-\text{CH}=\text{}$ ), 4.18 (t,  $J = 7.5$  Hz, 2H,  $-\text{NCH}_2-$ ), 4.93–5.04 (m, 2H,  $=\text{CH}_2$ ), 5.77–5.87 (m, 1H,  $-\text{CH}=\text{}$ ), 7.80–7.84 (1H, Ar), 7.88–7.90 (1H, Ar), 8.50–8.52 (1H, Ar), 8.62–8.64 (2H, Ar) ppm.  $^{13}\text{C}$  NMR (100 MHz,  $\text{CDCl}_3$ ):  $\delta$  -0.2, 26.4, 27.6, 33.5, 40.3, 101.2, 105.2, 114.7, 122.3, 122.9, 127.2, 127.5, 127.9, 130.2, 131.1, 131.5, 131.7, 132.3, 138.5, 163.6, 163.9 ppm.

### ***N*-(5-Hexenyl)-4-ethynyl-1,8-naphthalimide**

*N*-(5-Hexene-1-yl)-4-[2-(trimethylsilyl)ethynyl]-1,8-naphthalimide (1.69 g, 4.5 mmol) and K<sub>2</sub>CO<sub>3</sub> (1.24 g, 9.0 mmol) were added to a solution of CH<sub>2</sub>Cl<sub>2</sub> (5 mL) and CH<sub>3</sub>OH (5 mL). The resulting mixture was stirred at r.t. for 30 min. CH<sub>2</sub>Cl<sub>2</sub> (30 mL) was added to the mixture, and the resulting mixture was washed with saturated NaCl aq. The organic layer was separated from the water layer, dried over anhydrous MgSO<sub>4</sub>, concentrated, and the residual mass was purified by silica gel column chromatography eluted with CH<sub>2</sub>Cl<sub>2</sub> to obtain a yellow solid (1.22 g). It was washed with warm hexane and the insoluble parts were removed by filtration. The filtrate was concentrated to obtain the title compound as a yellow solid (1.16 g, 3.8 mmol) in 85% yield. <sup>1</sup>H NMR (400 MHz, CDCl<sub>3</sub>): δ 1.51–1.57 (m, 2H, –CH<sub>2</sub>–), 1.72–1.81 (m, 2H, –CH<sub>2</sub>–), 2.11–2.17 (m, 2H, –CH<sub>2</sub>–CH=), 3.74 (s, 1H, C≡CH), 4.18 (t, *J* = 7.5 Hz, 2H, –NCH<sub>2</sub>–), 4.93–5.05 (m, 2H, =CH<sub>2</sub>), 5.77–5.87 (m, 1H, –CH=), 7.81–7.85 (1H, Ar), 7.93–7.96 (1H, Ar), 8.52–8.54 (1H, Ar), 8.61–8.68 (2H, Ar) ppm. <sup>13</sup>C NMR (100 MHz, CDCl<sub>3</sub>): δ 26.4, 27.6, 33.5, 40.3, 80.3, 86.5, 114.7, 122.7, 122.9, 126.1, 127.6, 127.8, 130.1, 131.6, 131.6, 131.8, 132.1, 138.5, 163.5, 163.8 ppm. IR (KBr): 3568, 3227, 3078, 2939, 2855, 2098, 1696, 1656, 1613, 1587, 1508, 1465, 1441, 1389, 1354, 1322, 1286, 1245, 1174, 1115, 1094, 1074, 1061, 1010, 995, 954, 913, 864, 806, 783, 753, 737, 695, 670, 615, 680, 504 cm<sup>-1</sup>.

### **Monomer 1**

Compound **9** (913 mg, 3.00 mmol), PtI<sub>2</sub>(PEt<sub>3</sub>)<sub>2</sub> (822.3 mg, 1.20 mmol) and CuI (57.1 mg, 0.30 mmol) were dissolved a solution of CH<sub>2</sub>Cl<sub>2</sub> (5 mL) and Et<sub>3</sub>N (5 mL) under Ar. The resulting mixture was stirred at r.t. overnight. CH<sub>2</sub>Cl<sub>2</sub> (50 mL) was added to the mixture, and the solution was washed with 1.0 M NH<sub>4</sub>Cl aq. The organic layer was dried over

anhydrous MgSO<sub>4</sub>, and concentrated. The residual mass was purified by silica gel column chromatography eluted with CH<sub>2</sub>Cl<sub>2</sub> → CH<sub>2</sub>Cl<sub>2</sub>/CH<sub>3</sub>COOC<sub>2</sub>H<sub>5</sub> = 100/1 to obtain **1** as yellow solid (1.21 g, 1.16 mmol). Yield = 97%. <sup>1</sup>H NMR (400 MHz, CDCl<sub>3</sub>): δ 1.23–1.31 (m, 18H, –CH<sub>3</sub>), 1.49–1.57 (m, 4H, –CH<sub>2</sub>–), 1.72–1.79 (m, 4H, –CH<sub>2</sub>–), 2.10–2.24 (m, 16H, –PCH<sub>2</sub>–, –CH<sub>2</sub>–CH=), 4.15–4.20 (m, 4H, –NCH<sub>2</sub>–), 4.93–5.04 (m, 4H, =CH<sub>2</sub>), 5.77–5.87 (m, 2H, –CH=), 7.65–7.67 (2H, Ar), 7.71–7.75 (2H, Ar), 8.46–8.48 (2H, Ar), 8.58–8.60 (2H, Ar), 8.77–8.79 (2H, Ar) ppm. <sup>13</sup>C NMR (100 MHz, CDCl<sub>3</sub>): δ 8.4, 16.4, 16.6, 16.8, 26.4, 27.6, 33.5, 40.2, 108.9, 114.6, 118.7, 122.8, 126.2, 128.5, 128.9, 131.1, 132.1, 133.2, 133.4, 138.6, 164.2, 164.5 ppm. <sup>31</sup>P NMR (162 MHz, CDCl<sub>3</sub>): δ 13.0 (*J* = 2330 Hz) ppm. IR (KBr): 3076, 2960, 2934, 2876, 2084, 1695, 1658, 1610, 1581, 1506, 1458, 1438, 1421, 1383, 1351, 1238, 1170, 1145, 1093, 1067, 1037, 994, 914, 864, 789, 762, 734, 714, 643, 592, 581, 519 cm<sup>-1</sup>. APCI-MS (*m/z*): calcd. 1035.3838 ([C<sub>52</sub>H<sub>62</sub>N<sub>2</sub>O<sub>4</sub>P<sub>2</sub>Pt]<sup>-</sup>), found 1035.3833. Anal. Calcd. for C<sub>52</sub>H<sub>62</sub>N<sub>2</sub>O<sub>4</sub>P<sub>2</sub>Pt: C 60.28, H 6.03, N 2.70. Found: C 60.28, H 6.18, N 2.74.

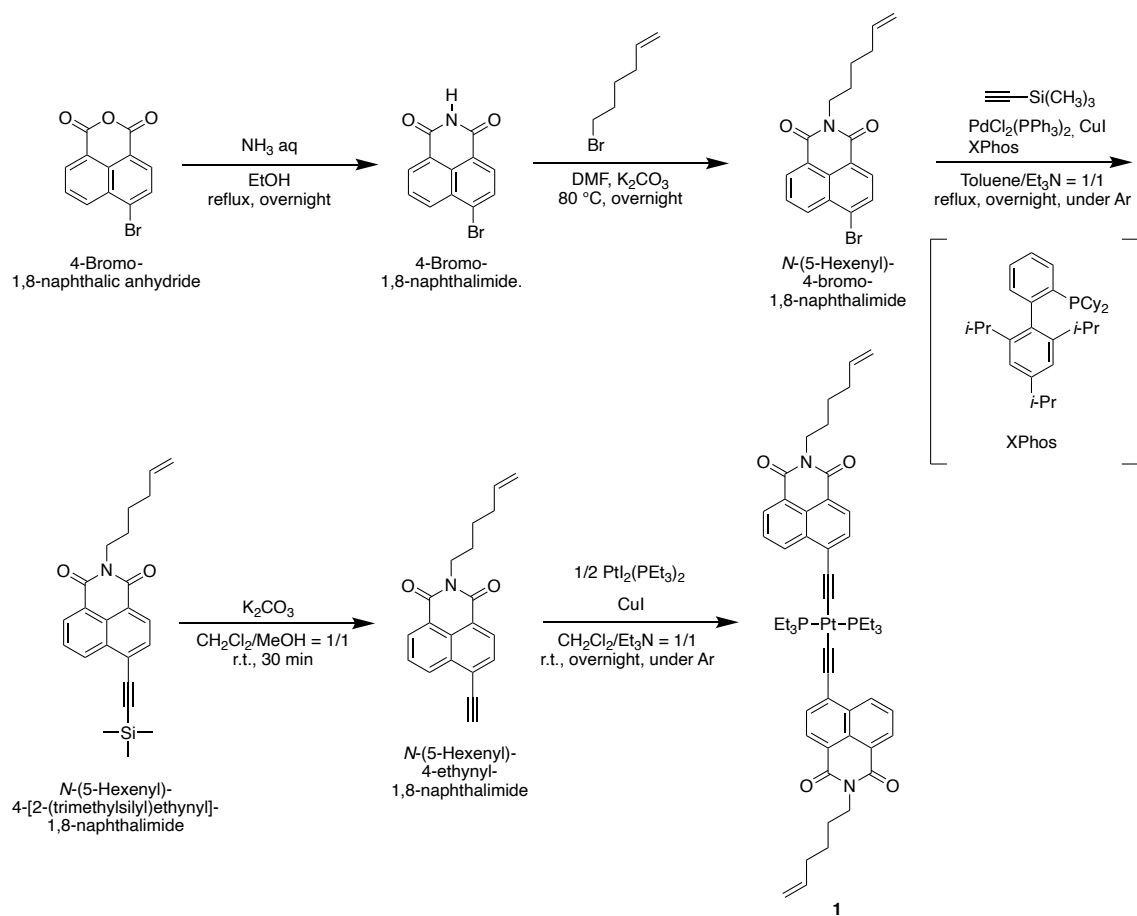

**Scheme S1** Synthetic route for monomer **1**.

## Synthesis of monomer **2**

**4-[2-(Trimethylsilyl)ethynyl]-1,8-naphthalimide.** 4-Bromo-1,8-naphthalic anhydride (3.31 g, 12.0 mmol),  $\text{PdCl}_2(\text{PPh}_3)_2$  (84.2 mg, 0.12 mmol), CuI (22.9 mg, 0.12 mmol) and XPhos (57.2 mg, 0.12 mmol) were dissolved in a solution of DMF (15 mL) and  $\text{Et}_3\text{N}$  (15 mL) under Ar. TMSA (1.47 g, 2.10 mL, 15.0 mmol) was added to the solution, and the resulting mixture was heated at 80 °C overnight.  $\text{CH}_2\text{Cl}_2$  (70 mL) was added to the mixture, and the solution was washed with 1.0 M  $\text{NH}_4\text{Cl}$  aq. The organic layer was separated from the water layer, dried over anhydrous  $\text{MgSO}_4$ , and concentrated. The residual mass was purified by silica gel column chromatography eluted with  $\text{CH}_2\text{Cl}_2 \rightarrow \text{CH}_2\text{Cl}_2/\text{CH}_3\text{COOC}_2\text{H}_5 = 20/1$  to obtain the title compound as a yellow solid (2.86 g, 9.7



mmol) in 81% yield.  $^1\text{H}$  NMR (400 MHz,  $\text{DMSO-}d_6$ ):  $\delta$  0.36 (s, 9H,  $-\text{Si}(\text{CH}_3)_3$ ), 7.95–8.03 (2H, Ar), 8.34–8.40 (1H, Ar), 8.47–8.52 (1H, Ar), 8.55–8.62 (1H, Ar), 11.81 (s, 1H, NH) ppm.  $^{13}\text{C}$  NMR (100 MHz,  $\text{DMSO-}d_6$ ):  $\delta$  –0.3, 101.2, 104.7, 122.7, 123.0, 125.7, 128.2, 128.4, 129.1, 130.4, 131.2, 131.4, 163.4, 163.8 ppm.

#### 4-Ethynyl-1,8-naphthalimide

4-[2-(Trimethylsilyl)ethynyl]-1,8-naphthalimide (1.33 g, 6.0 mmol) was added to a solution of THF (20 mL) and MeOH (20 mL). KOH aq (10 mL, 1.01 g, 18.0 mmol) was added to the solution, and the resulting mixture was stirred at r.t. for 2 h. The solution was acidified with 1.0 M HCl aq. to precipitate a solid mass. It was collected by filtration, and the solid was washed with water and cooled MeOH to obtain a yellow solid (1.08 g, 4.9 mmol) in 81% yield.  $^1\text{H}$  NMR (400 MHz,  $\text{DMSO-}d_6$ ):  $\delta$  5.09 (s, 1H,  $\text{C}\equiv\text{CH}$ ), 7.96–8.05 (2H, Ar), 8.39–8.41 (1H, Ar), 8.50–8.52 (1H, Ar), 8.62–8.64 (1H, Ar), 11.83 (s, 1H, NH) ppm.

#### Monomer 2

4-Ethynyl-1,8-naphthalimide (663.7 mg, 3.0 mmol),  $\text{PtI}_2(\text{PEt}_3)_2$  (1.08 g, 1.5 mmol) and CuI (57.1 mg, 0.30 mmol) were dissolved a solution of DMF (10 mL) and  $\text{Et}_3\text{N}$  (10 mL) under Ar. The resulting mixture was stirred at r.t. for 3 days to precipitate a solid. The resulting mixture was added to a solution of 1.0 M  $\text{NH}_4\text{Cl}$  aq (100 mL) and MeOH (100 mL), and stirred at r.t. overnight to precipitate a solid mass. It was collected by filtration and washed with water and MeOH, and dried *in vacuo* to obtain yellow solid. It was purified by silica gel chromatography eluted with  $\text{CH}_2\text{Cl}_2 \rightarrow \text{CH}_2\text{Cl}_2/\text{MeOH} = 20/1$  to obtain **2** as a yellow solid (1.21 g, 1.39 mmol) in 92% yield.  $^1\text{H}$  NMR (400 MHz,  $\text{DMSO-}d_6$ ):  $\delta$  1.18–1.26 (m, 18H,  $-\text{CH}_3$ ), 2.17–2.21 (m, 12H,  $-\text{PCH}_2-$ ), 7.69 (2H, Ar), 7.90 (2H,

Ar), 8.33 (2H, Ar), 8.45 (2H, Ar), 8.73 (2H, Ar), 11.66 (s, 2H, NH) ppm.  $^{31}\text{P}$  NMR (162 MHz, DMSO- $d_6$ ):  $\delta$  13.9 ( $J = 2279$  Hz) ppm. IR (KBr): 3648, 3175, 3059, 2962, 2931, 2077, 1693, 1674, 1579, 1505, 1458, 1391, 1363, 1265, 1235, 1188, 1102, 1039, 989, 856, 779, 758, 698, 640, 606, 519  $\text{cm}^{-1}$ . APCI-MS ( $m/z$ ): calcd. 871.2268 ( $[\text{C}_{40}\text{H}_{42}\text{N}_2\text{O}_4\text{P}_2\text{Pt}]^-$ ), found 871.2256.

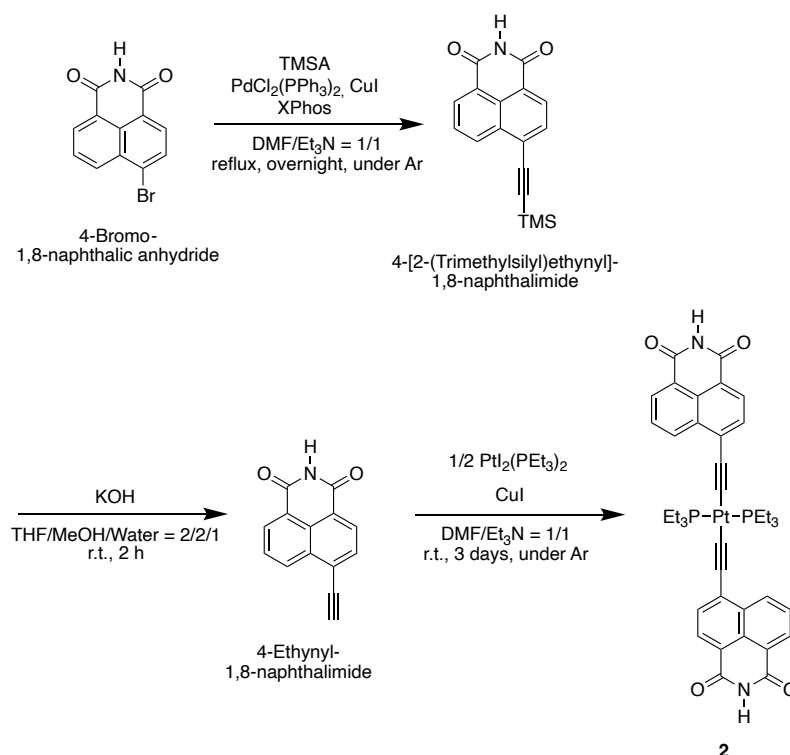

**Scheme S2** Synthetic route for monomer **2**.

### ADMET oligomerization

A solution of 1,3-bis(2,4,6-trimethylphenyl)-2-imidazolidinylidene)dichloro(phenylmethylene)(tricyclohexylphosphine)ruthenium (Grubbs second generation catalyst, **G2**, 5.10 mg, 0.006 mmol) in *o*-dichlorobenzene (1.2 mL) was added to monomer **1** (310.8 mg, 0.03 mmol) fed in a Schlenk tube connected

with a trap, a mercury manometer and a diaphragm vacuum pump, in that order as shown in Fig. S1. The solution was degassed by the freeze-pump-thaw method three times. It was stirred at 50 °C for 48 h under reduced pressure (11.2 kPa) using a KNF diaphragm vacuum pump N810.3FT.18(Ex). Ethyl vinyl ether (1.0 mL, ca. 0.01 mol) and CH<sub>2</sub>Cl<sub>2</sub> (1.0 mL) were added to the solution, and stirred at r.t. for 15 min. The resulting mixture was poured into a large amount of MeOH to precipitate a solid mass. It was separated by filtration using a membrane filter (ADVANTEC H100A047A), washed with large amount of MeOH, and dried *in vacuo* to obtain a solid mass. It was dissolved in CH<sub>2</sub>Cl<sub>2</sub>, and reprecipitated with hexane to obtain oligo(**1**) as a yellow solid in 96% yield.  $M_n = 8,900$ ,  $D = 2.21$ .

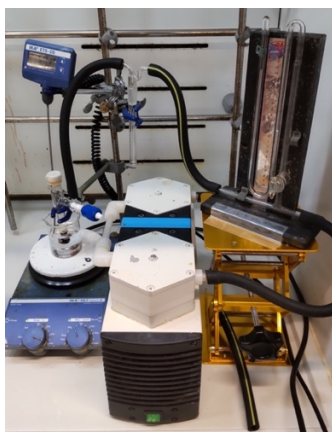

**Fig. S1** Photograph of an apparatus for ADMET oligomerization.

### Polycondensation of **2** with **3a–3c**

Typical procedure: A solution of **2** (261.5 mg, 0.30 mmol) in *N*-methylpyrrolidone (NMP) (14.4 mL) was heated at 90 °C until **2** was completely dissolved in a Schlenk tube. K<sub>2</sub>CO<sub>3</sub> (414.6 mg, 3.0 mmol) and a solution of 1,6-dibromohexane (**3a**, 0.6 mL, 73.2 mg, 0.30 mmol) were added to the solution, and the mixture was stirred at 90 °C for 6 h. It was poured into a large amount of MeOH (300 mL) to precipitate a solid. It was separated

by filtration using a membrane filter (ADVANTEC H100A047A), washed with large amount of water and MeOH, and dried *in vacuo* to obtain oligo(**2-3a**) in 94% yield. Oligo(**2-3b**) and oligo(**2-3c**) were synthesized in a manner similar to oligo(**2-3a**).

### Spectroscopic data for the oligomers

Oligo(**1**): Yield 96%.  $^1\text{H}$  NMR (400 MHz,  $\text{CDCl}_3$ ):  $\delta$  1.16–1.31 (m, 18H,  $-\text{CH}_3$ ), 1.41–1.88 (m, 12H,  $-\text{CH}_2-$ ), 2.04–2.42 (m, 16H,  $-\text{PCH}_2-$ ,  $-\text{CH}_2-\text{CH}=\text{}$ ), 4.15–4.35 (m, 4H,  $-\text{NCH}_2-$ ), 4.93–5.11 (m, 1H,  $=\text{CH}_2$ ), 5.36–5.58 (internal  $-\text{CH}=\text{}$ ), 5.77–5.92 (terminal  $-\text{CH}=\text{}$ ), 7.61–7.74 (4H, Ar), 8.46–8.60 (4H, Ar), 8.76–8.78 (2H, Ar) ppm.  $^{31}\text{P}$  NMR (162 MHz,  $\text{CDCl}_3$ ):  $\delta$  13.0 ( $J = 2330$  Hz) ppm. Oligo(**2-3a**): Yield 94%.  $^1\text{H}$  NMR (400 MHz,  $\text{CDCl}_3$ ):  $\delta$  1.19–1.31 (m, 18H,  $-\text{CH}_3$ ), 1.43–1.76 (m, 8H), 2.10–2.22 (m, 12H,  $-\text{PCH}_2-$ ), 4.18 (t,  $J = 7.5$  Hz, 4H,  $-\text{NCH}_2-$ ), 7.60–7.77 (4H, Ar), 8.37–8.47 (2H, Ar), 8.52–8.59 (2H, Ar), 8.76–8.83 (2H, Ar) ppm.  $^{31}\text{P}$  NMR (162 MHz,  $\text{CDCl}_3$ ):  $\delta$  13.0 ( $J = 2355$  Hz) ppm. Oligo(**2-3b**): Yield 93%.  $^1\text{H}$  NMR (400 MHz,  $\text{CDCl}_3$ ):  $\delta$  1.19–1.31, 1.43–1.76 (m, 30H,  $-\text{CH}_3$ ,  $-\text{CH}_2-$ ), 2.10–2.22 (m, 12H,  $-\text{PCH}_2-$ ), 4.18 (t,  $J = 7.5$  Hz, 4H,  $-\text{NCH}_2-$ ), 7.60–7.77 (4H, Ar), 8.37–8.47 (2H, Ar), 8.52–8.59 (2H, Ar), 8.76–8.83 (2H, Ar) ppm.  $^{31}\text{P}$  NMR (162 MHz,  $\text{CDCl}_3$ ):  $\delta$  13.0 ( $J = 2355$  Hz) ppm. Oligo(**2-3c**): Yield 92%.  $^1\text{H}$  NMR (400 MHz,  $\text{CDCl}_3$ ):  $\delta$  1.09–1.41, 1.63–1.74 (m, 38H,  $-\text{CH}_3$ ,  $-\text{CH}_2-$ ), 2.16–2.23 (m, 12H,  $-\text{PCH}_2-$ ), 4.17 (t,  $J = 7.5$  Hz, 4H,  $-\text{NCH}_2-$ ), 7.63–7.76 (4H, Ar), 8.44–8.48 (2H, Ar), 8.56–8.60 (2H, Ar), 8.74–8.80 (2H, Ar) ppm.  $^{31}\text{P}$  NMR (162 MHz,  $\text{CDCl}_3$ ):  $\delta$  13.0 ( $J = 2355$  Hz) ppm.

## Computations

All computational calculations were performed with the Gaussian 16 program,<sup>S3</sup> Fujitsu-Arm-G16 Rev C.01 running on Fugaku, Center for Computational Science, RIKEN, and ES64L-G16 Rev B.01 running on the supercomputer systems, Academic Center for Computing and Media Studies, Kyoto University. The UV–vis and IR absorption spectra were simulated by the TD-DFT and DFT methods with the  $\omega$ B97XD functional in conjugation with the basis set, 6-31G\* (C, H, N, O, P) and LANL2DZ (Pt).

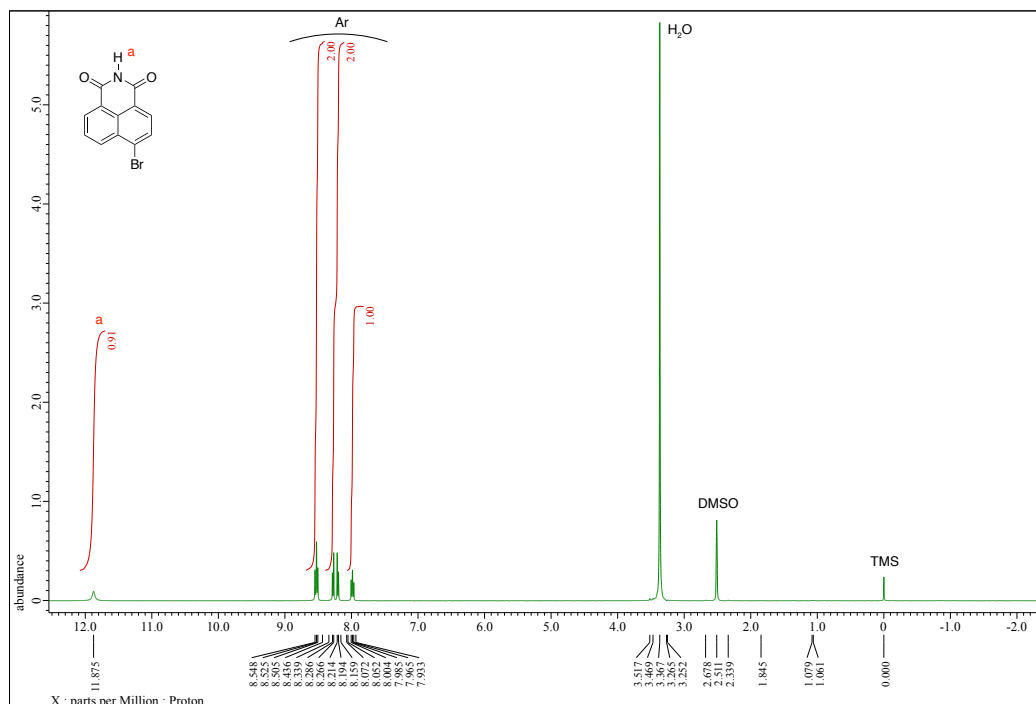

**Fig. S2**  $^1\text{H-NMR}$  (400 MHz) spectrum of 4-bromo-1,8-naphthalimide measured in  $\text{DMSO-}d_6$  with tetramethylsilane (TMS) as an internal standard.

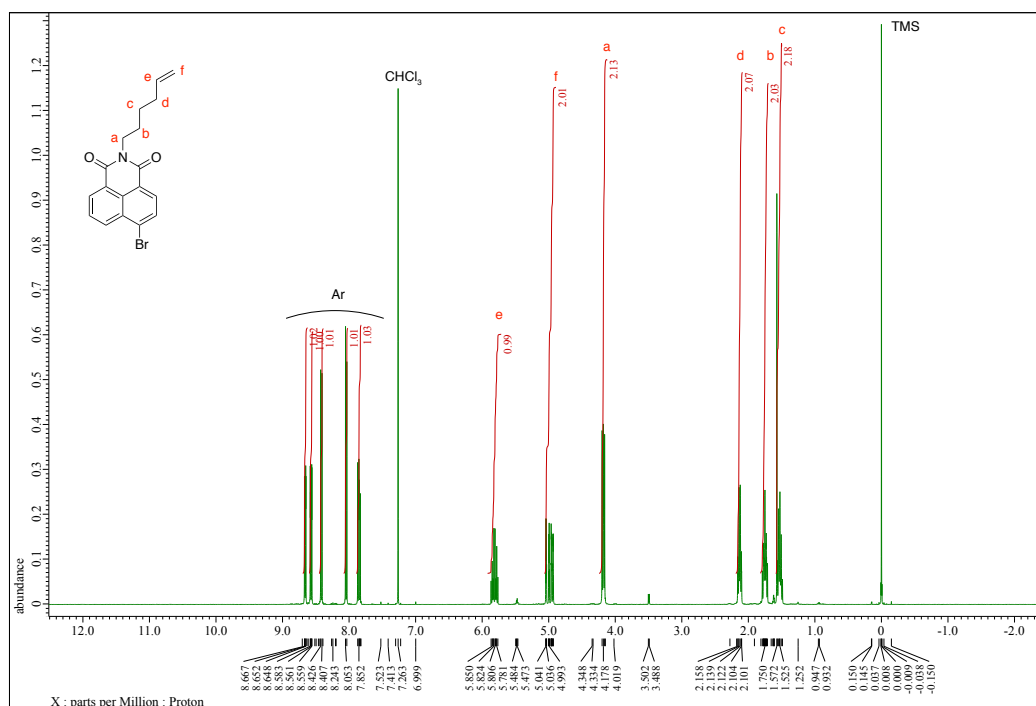

**Fig. S3.**  $^1\text{H-NMR}$  (400 MHz) spectrum of *N*-(5-hexenyl)-4-bromo-1,8-naphthalimide measured in  $\text{CDCl}_3$  with TMS as an internal standard.

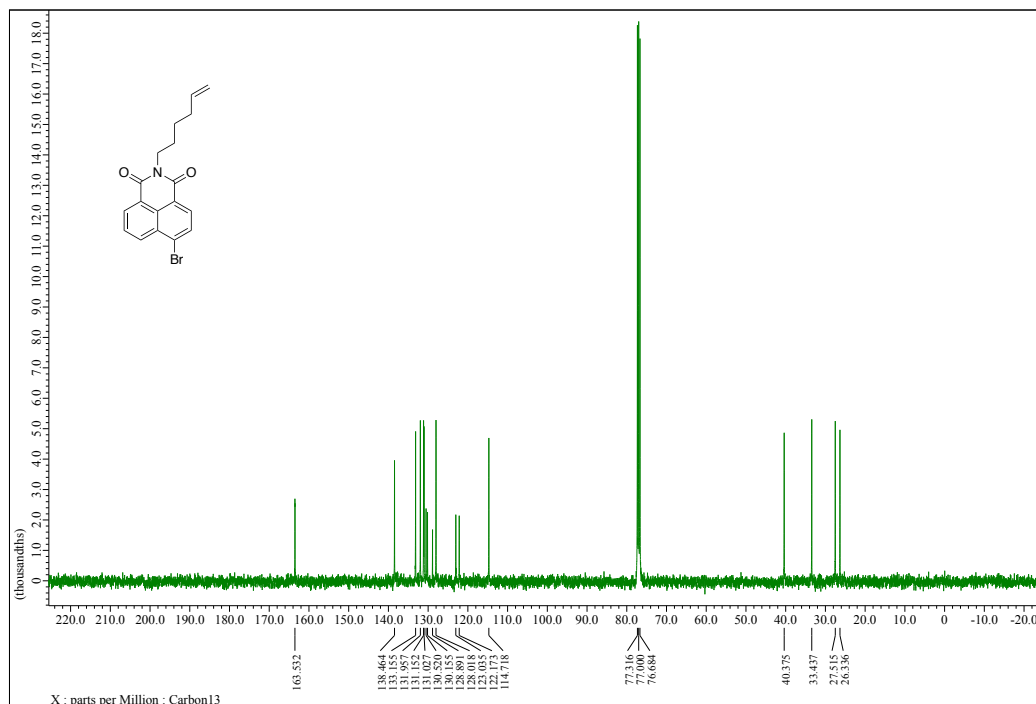

**Fig. S4.**  $^{13}\text{C}$ -NMR (100 MHz) spectrum of *N*-(5-hexenyl)-4-bromo-1,8-naphthalimide measured in  $\text{CDCl}_3$ .

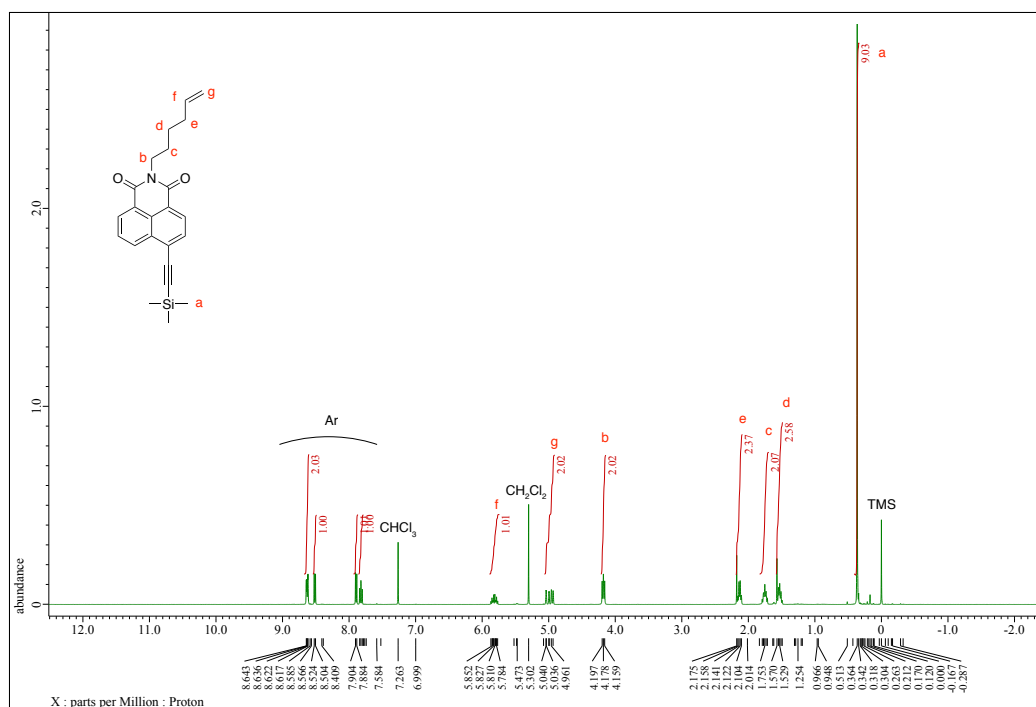

**Fig. S5**  $^1\text{H}$ -NMR (400 MHz) spectrum of *N*-(5-hexenyl)-4-[2-(trimethylsilyl)ethynyl]-1,8-naphthalimide measured in  $\text{CDCl}_3$  with TMS as an internal standard.

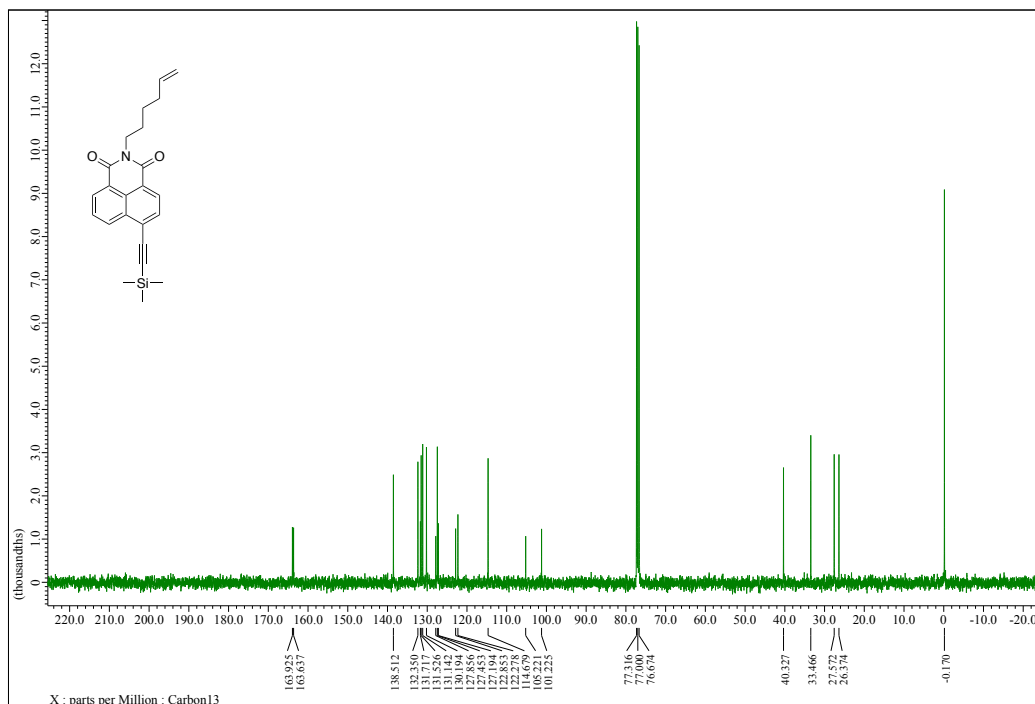

**Fig. S6**  $^{13}\text{C}$ -NMR (100 MHz) spectrum of *N*-(5-hexenyl)-4-[2-(trimethylsilyl)ethynyl]-1,8-naphthalimide measured in  $\text{CDCl}_3$ .

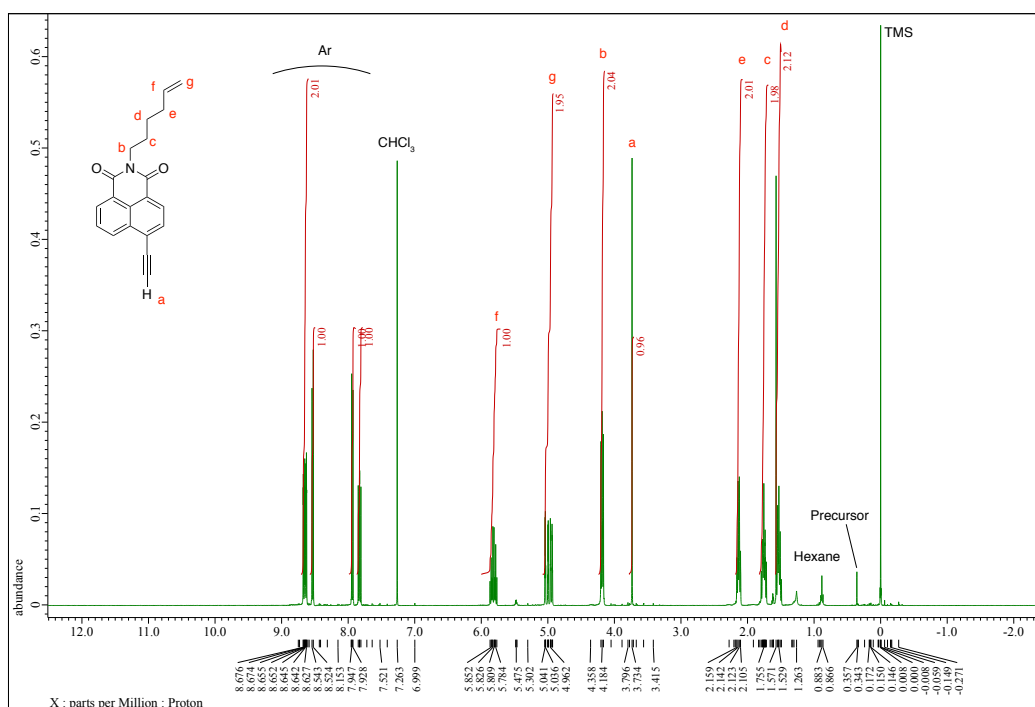

**Fig. S7**  $^1\text{H}$ -NMR (400 MHz) spectrum of *N*-(5-hexenyl)-4-ethynyl-1,8-naphthalimide measured in  $\text{CDCl}_3$  with TMS as an internal standard.



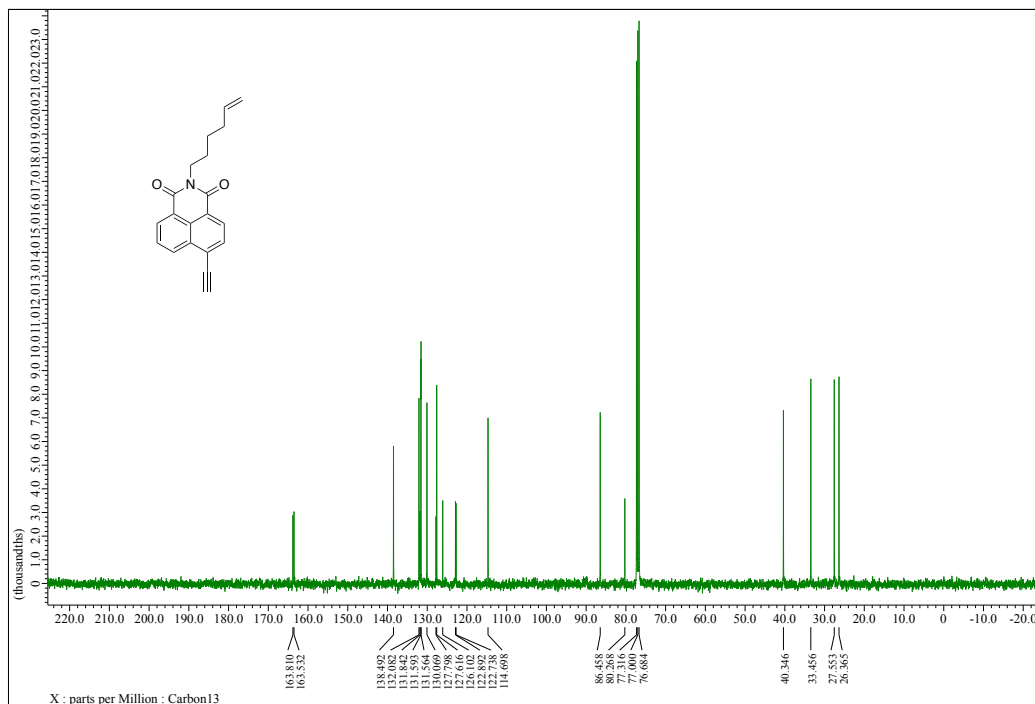

**Fig. S8**  $^{13}\text{C}$ -NMR (100 MHz) spectrum of *N*-(5-hexenyl)-4-ethynyl-1,8-naphthalimide measured in  $\text{CDCl}_3$ .

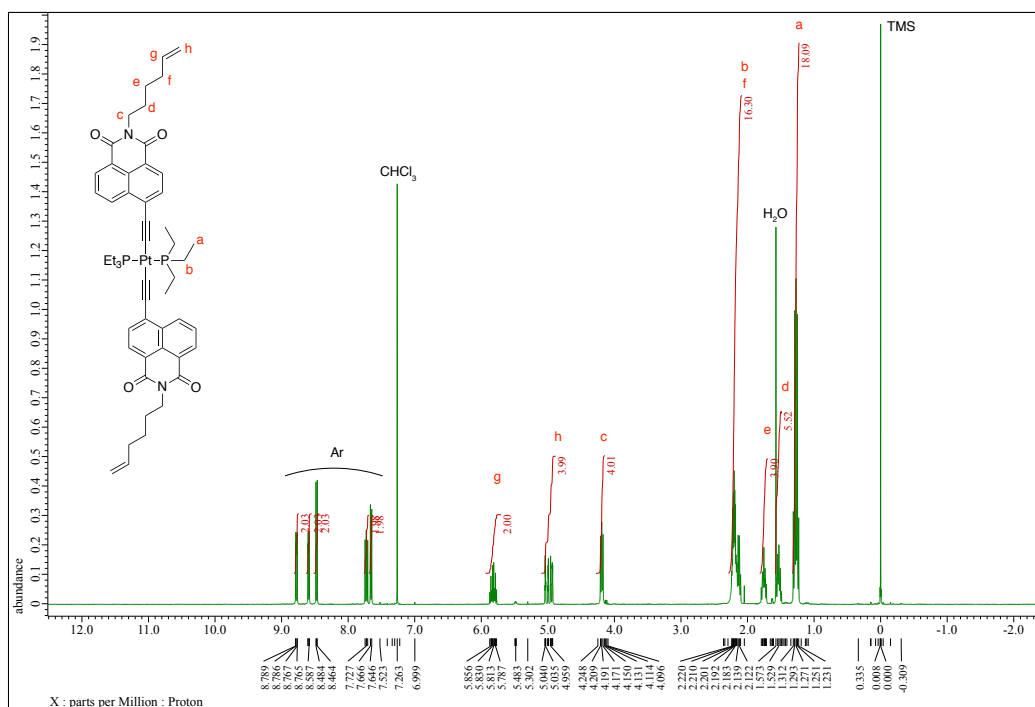

**Fig. S9**  $^1\text{H}$ -NMR (400 MHz) spectrum of **1** measured in  $\text{CDCl}_3$  with TMS as an internal standard.



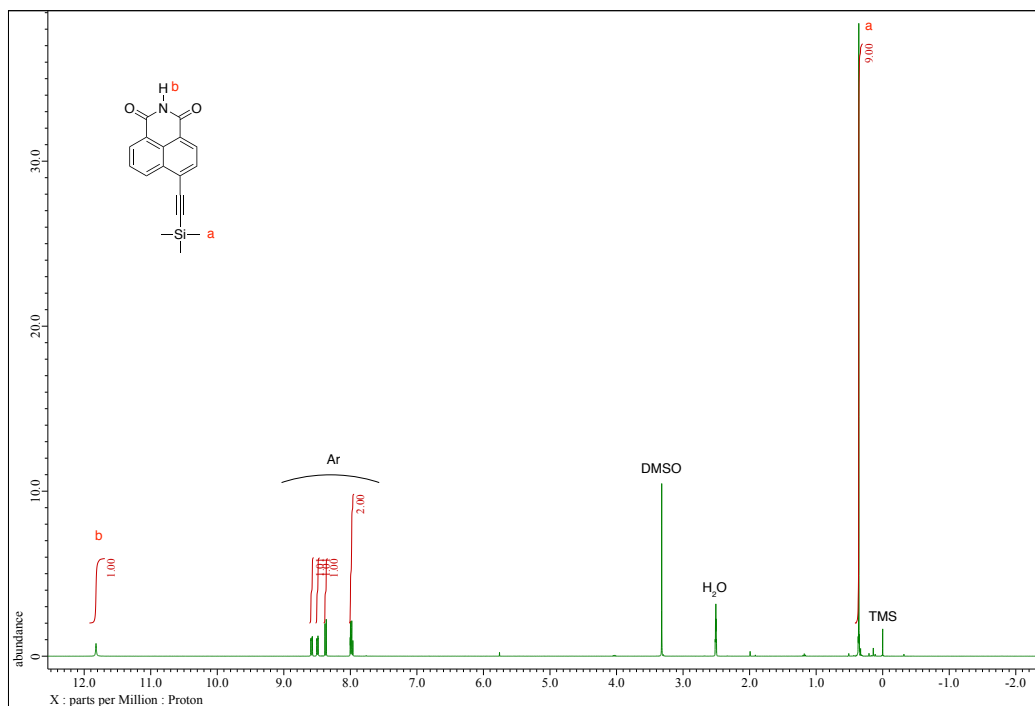

**Fig. S12**  $^1\text{H}$ -NMR (400 MHz) spectrum of 4-[2-(trimethylsilyl)ethynyl]-1,8-naphthalimide measured in  $\text{DMSO-}d_6$  with TMS as an internal standard.

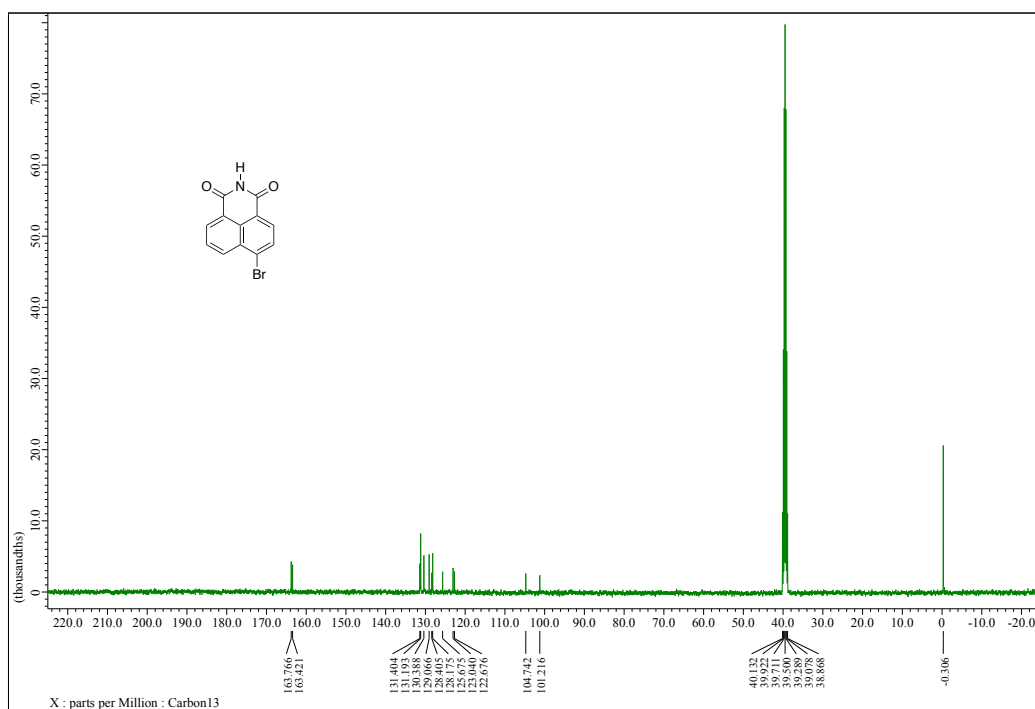

**Fig. S13**  $^{13}\text{C}$ -NMR (100 MHz) spectrum of 4-[2-(trimethylsilyl)ethynyl]-1,8-naphthalimide measured in  $\text{DMSO-}d_6$ .



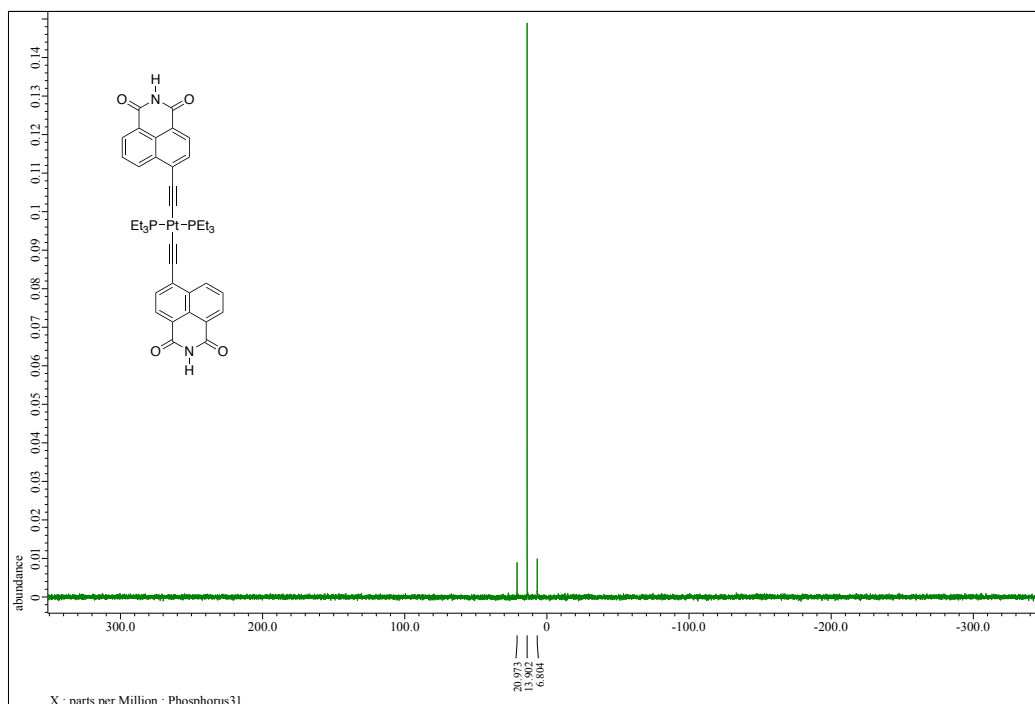

**Fig. S16**  $^{31}\text{P}$ -NMR (162 MHz) spectrum of **2** measured in  $\text{DMSO-}d_6$ .

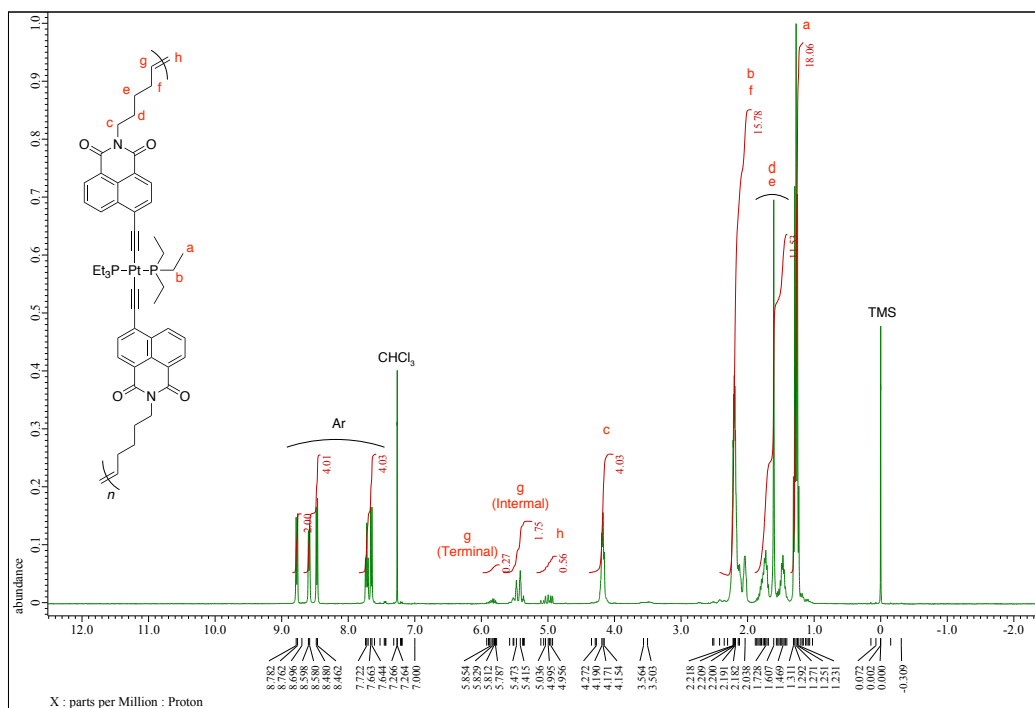

**Fig. S17**  $^1\text{H}$ -NMR (400 MHz) spectrum of oligo(**1**) measured in  $\text{CDCl}_3$  with TMS as an internal standard.

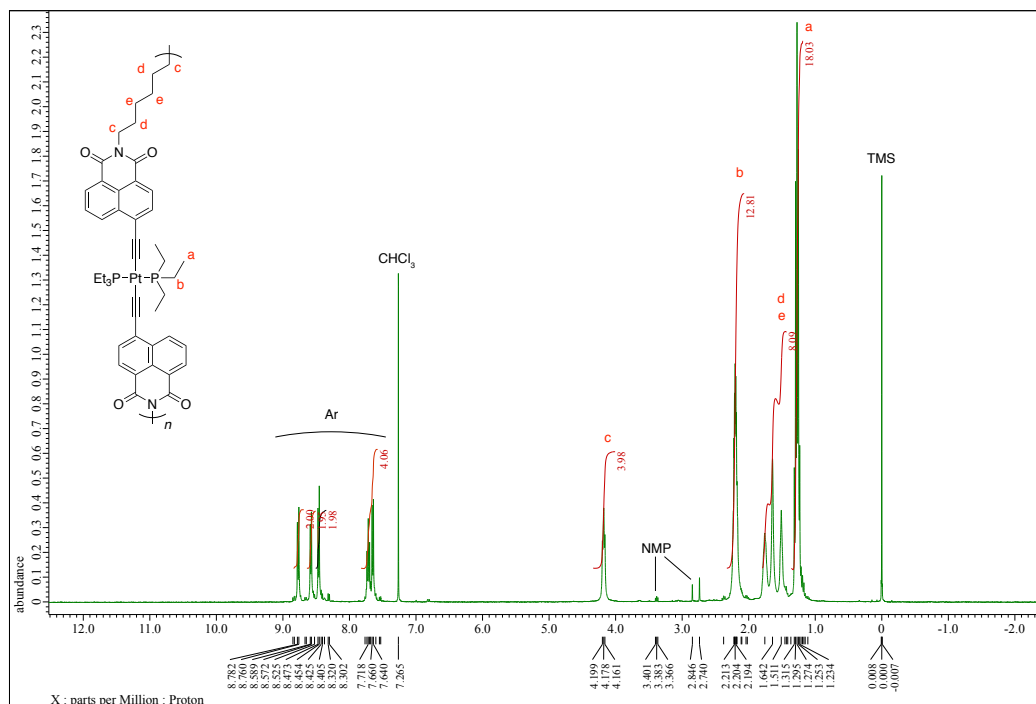

**Fig. S18**  $^1\text{H-NMR}$  (400 MHz) spectrum of oligo(2-3a) measured in  $\text{CDCl}_3$  with TMS as an internal standard.

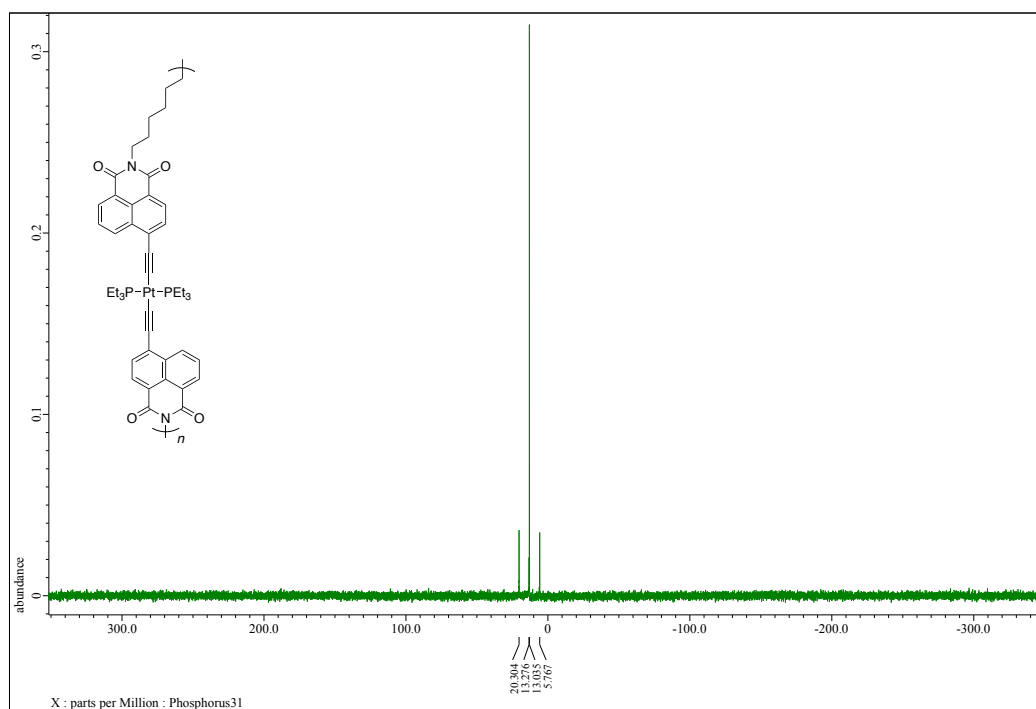

**Fig. S19**  $^{31}\text{P-NMR}$  (162 MHz) spectrum of oligo(2-3a) measured in  $\text{CDCl}_3$ .

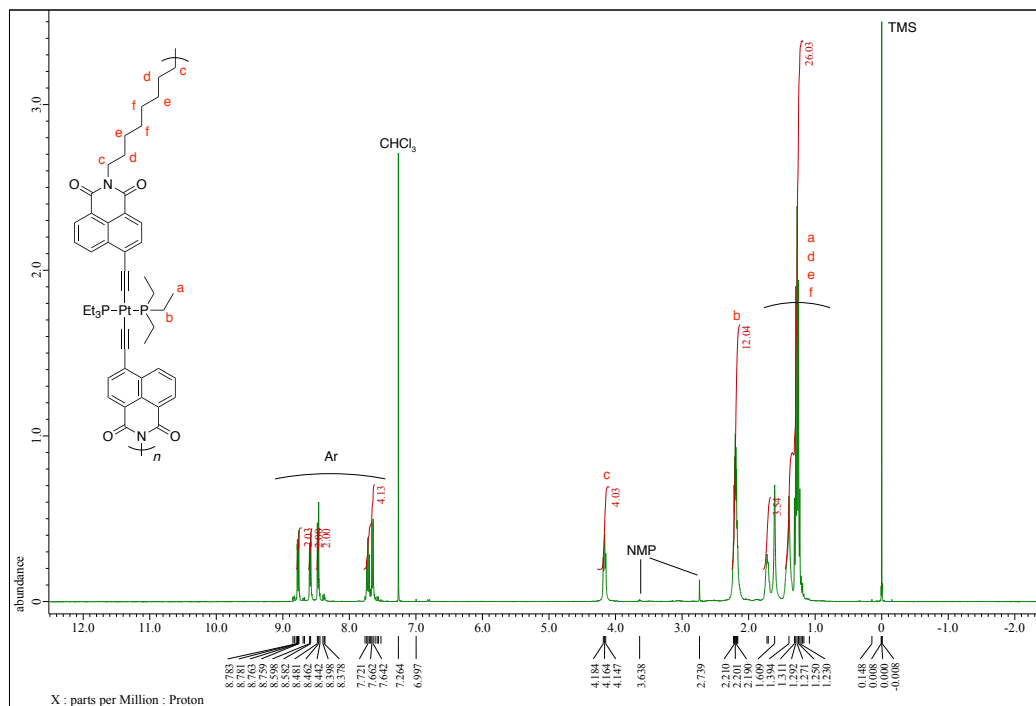

**Fig. S20** <sup>1</sup>H-NMR (400 MHz) spectrum of oligo(2-3b) measured in CDCl<sub>3</sub> with TMS as an internal standard.

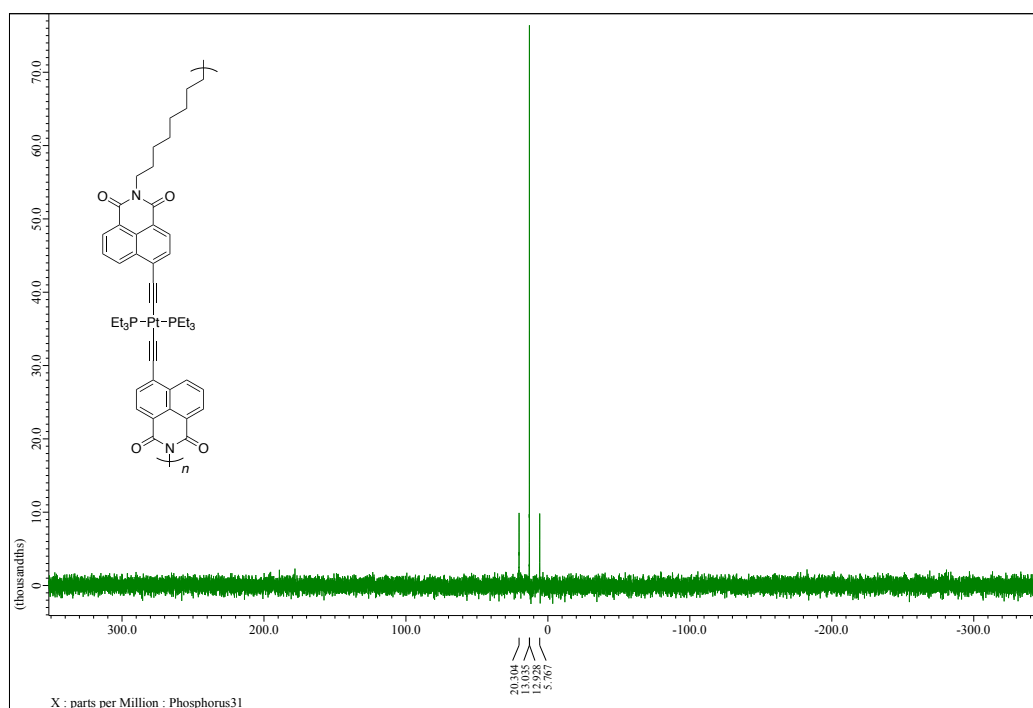

**Fig. S21** <sup>31</sup>P-NMR (162 MHz) spectrum of oligo(2-3b) measured in CDCl<sub>3</sub>.

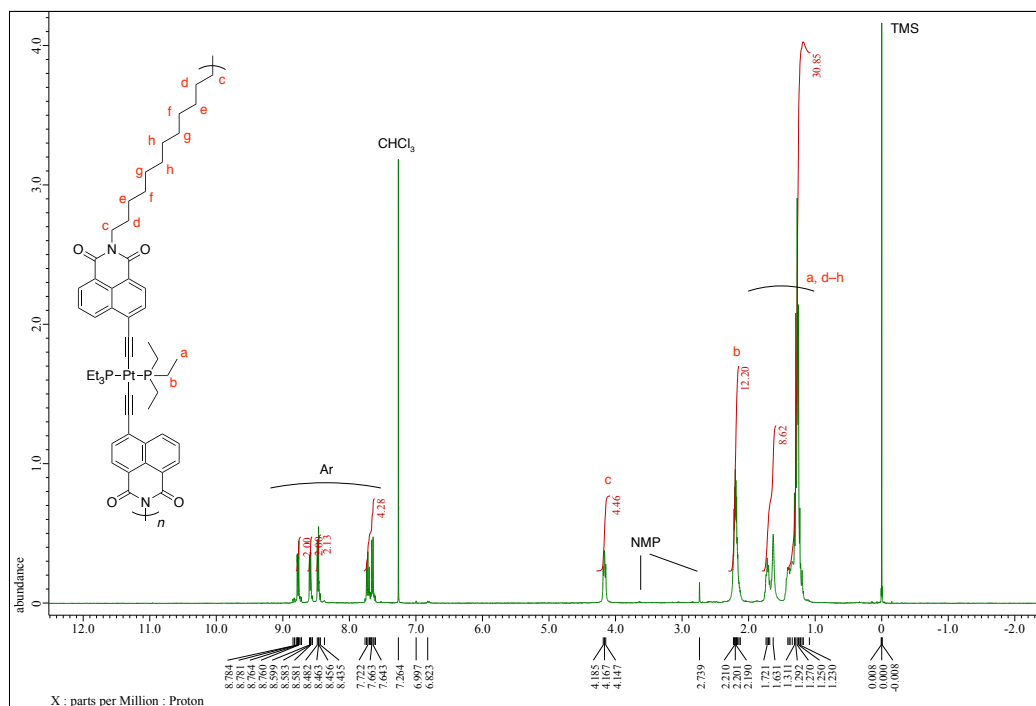

**Fig. S22** <sup>1</sup>H-NMR (400 MHz) spectrum of oligo(2-3c) measured in CDCl<sub>3</sub> with TMS as an internal standard.

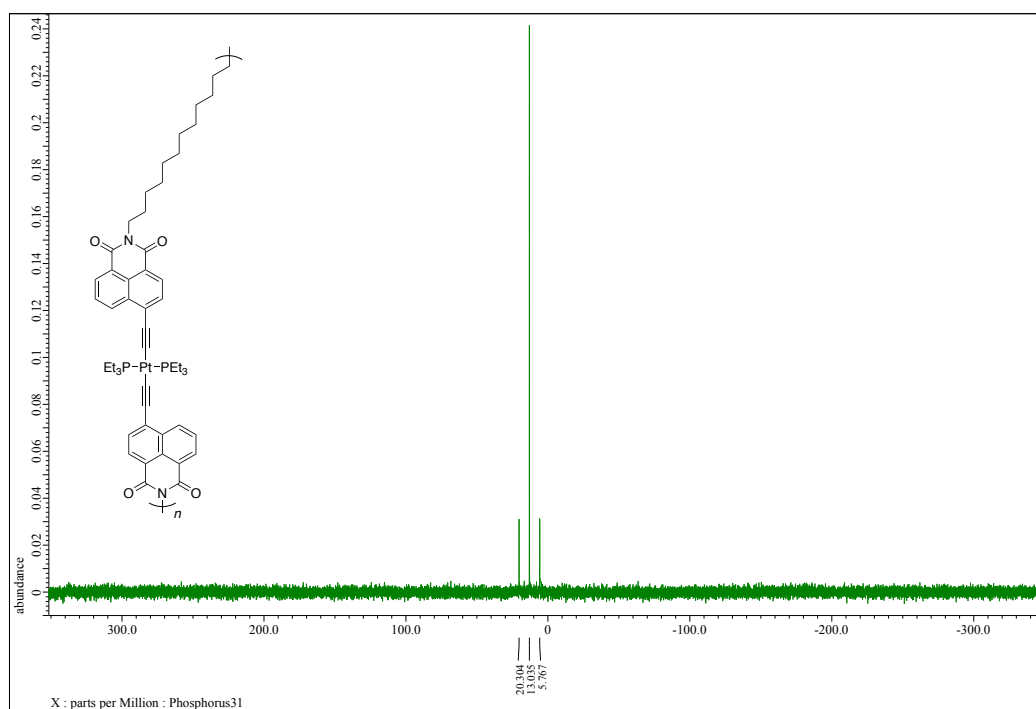

**Fig. S23** <sup>31</sup>P-NMR (162 MHz) spectrum of oligo(2-3c) measured in CDCl<sub>3</sub>.



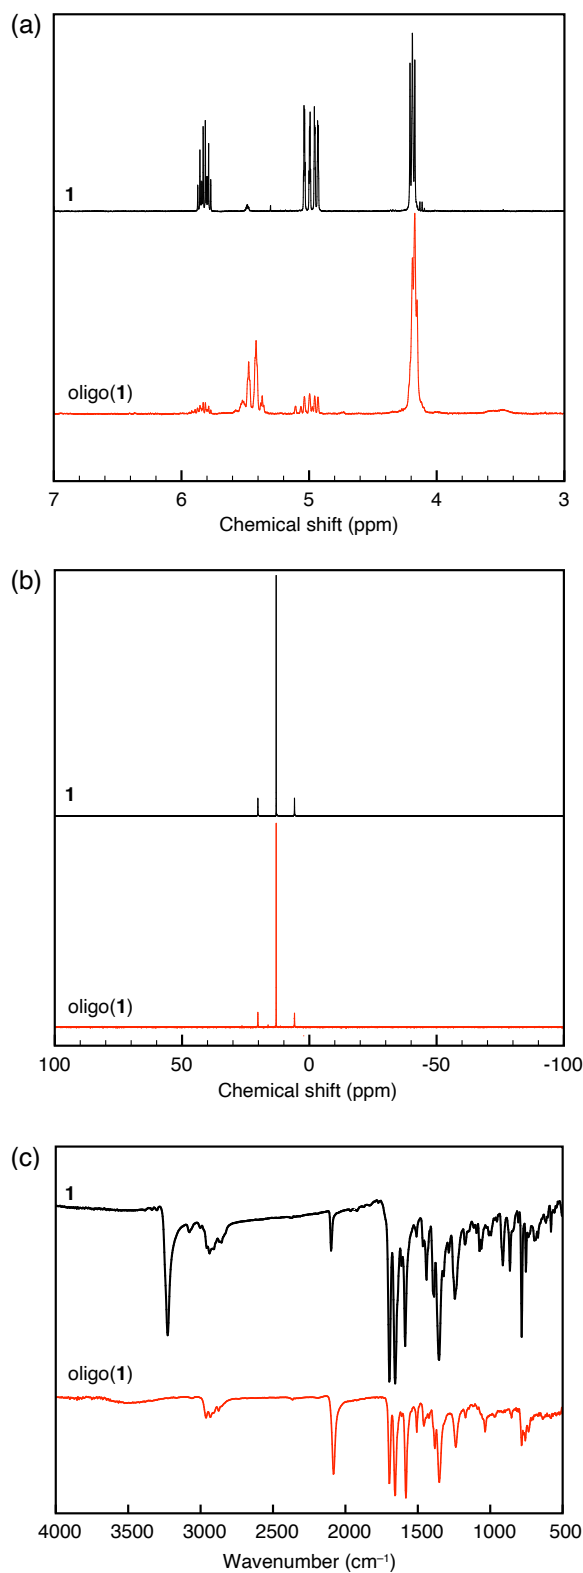

**Fig. S24** (a) Partial  $^1\text{H}$  (400 MHz) and (b)  $^{31}\text{P}$ -NMR (162 MHz) spectra of **1** and oligo(**1**) measured in  $\text{CDCl}_3$ , and (c) their IR absorption spectra measured by the KBr pellet method.

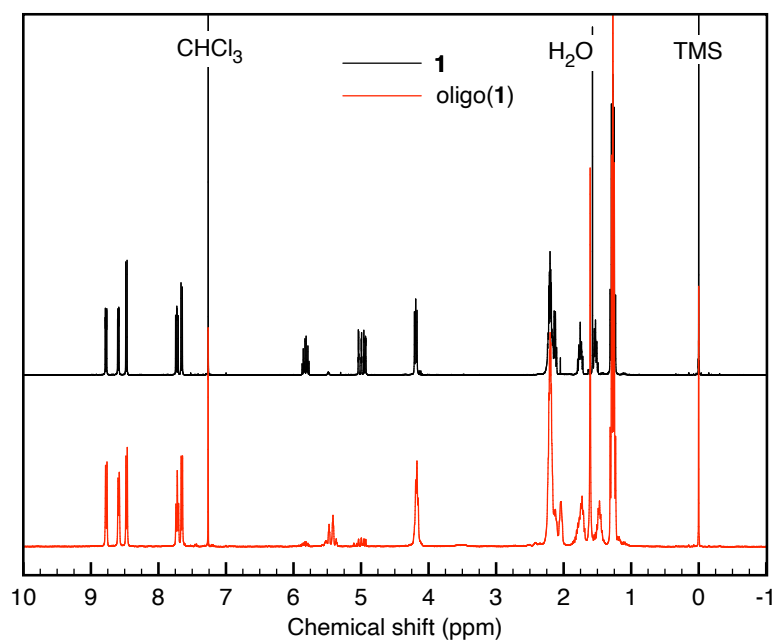

**Fig. S25** <sup>1</sup>H-NMR (400 MHz) spectra of **1** and oligo(**1**) measured in CDCl<sub>3</sub> with TMS as an internal standard.

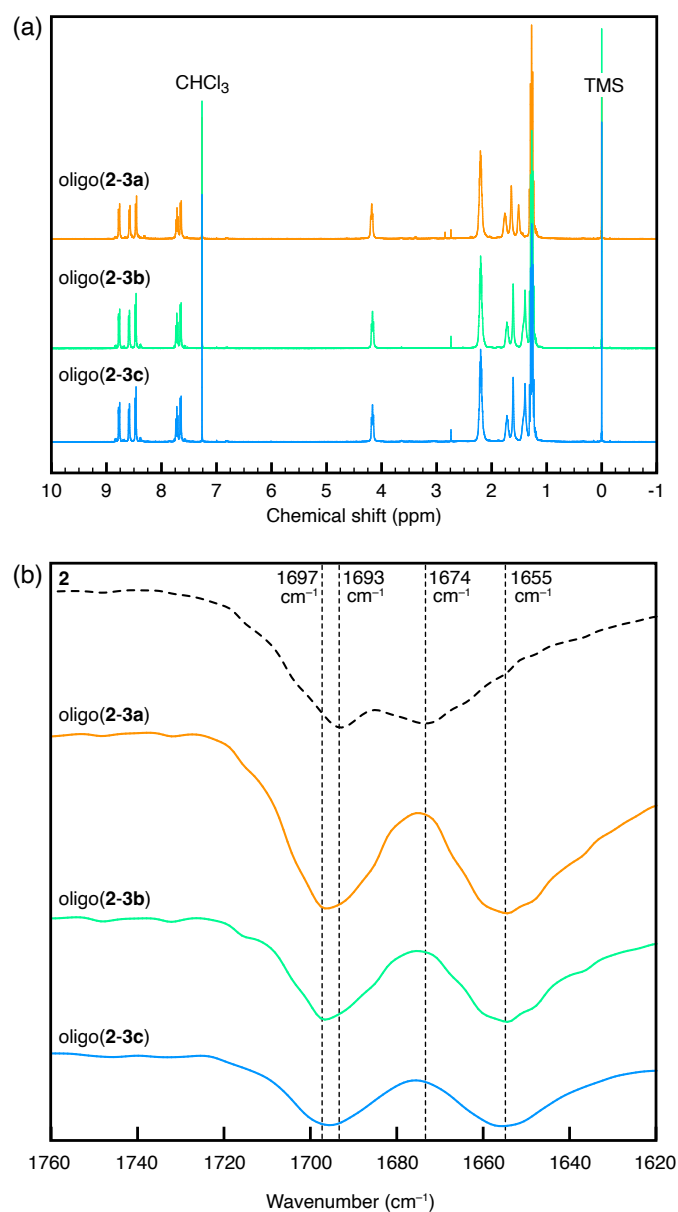

**Fig. S26** (a) <sup>1</sup>H-NMR spectra of oligo(2-3a)–oligo(2-3c) measured with TMS as an internal standard in CDCl<sub>3</sub>, and (b) IR absorption spectra of 2 and oligo(2-3a)–oligo(2-3c) measured by the KBr method.

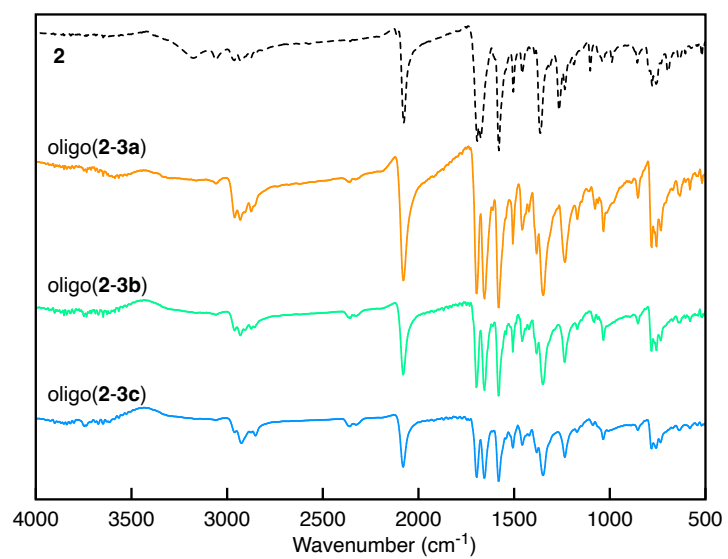

**Fig. S27** IR (KBr) absorption spectra of **2** and oligo(**2-3a**)–oligo(**2-3c**).

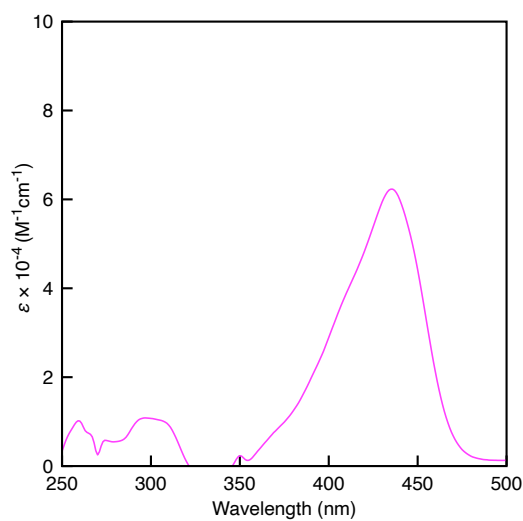

**Fig. S28** UV-vis absorption spectrum of **1** measured in  $\text{CHCl}_3$  ( $c = 3.0 \mu\text{M}$ ).

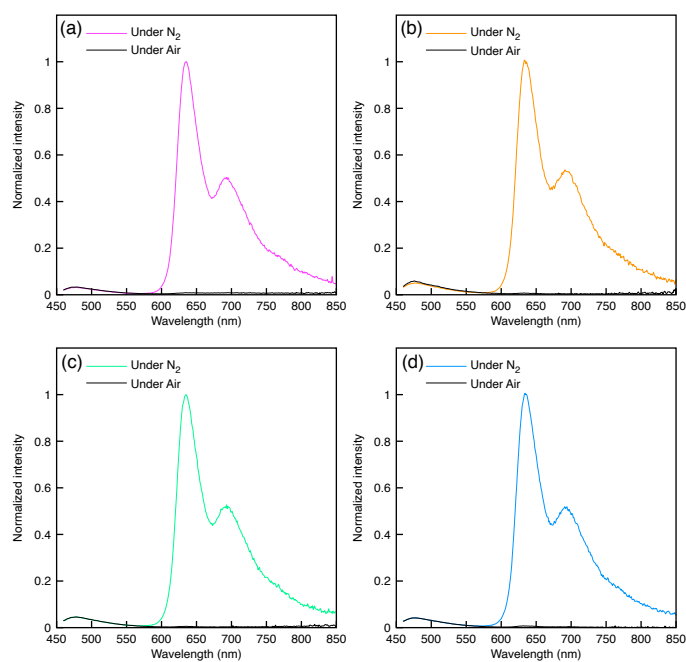

**Fig. S29** Photoluminescence spectra of (a) **1**, (b) oligo(**2-3a**), (c) oligo(**2-3b**) and (d) oligo(**2-3c**) measured in  $\text{CHCl}_3$  ( $c = 1.5 \mu\text{M}$ ) excited at 440 nm. The intensity was normalized at 635 nm.

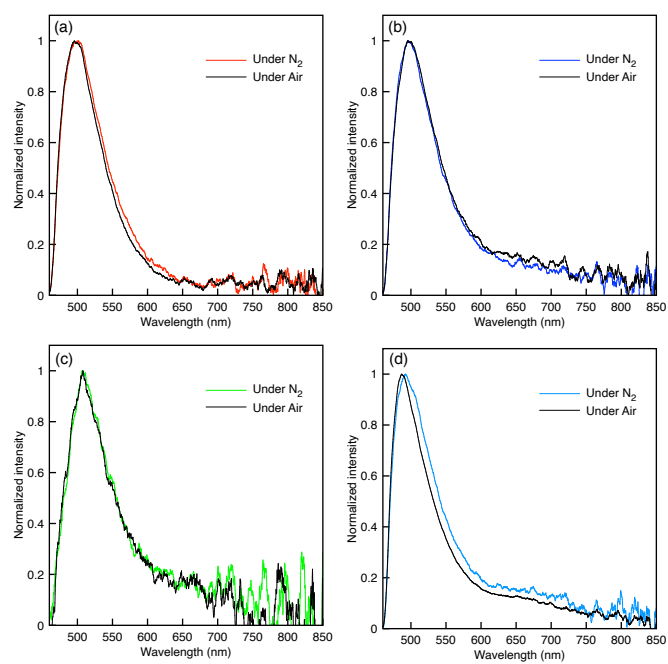

**Fig. S30** Photoluminescence spectra of drop-casted films of (a) oligo(1), (b) oligo(2-3a), (c) oligo(2-3b) and (d) oligo(2-3c) excited at 450 nm. The intensities were normalized at 495 nm.

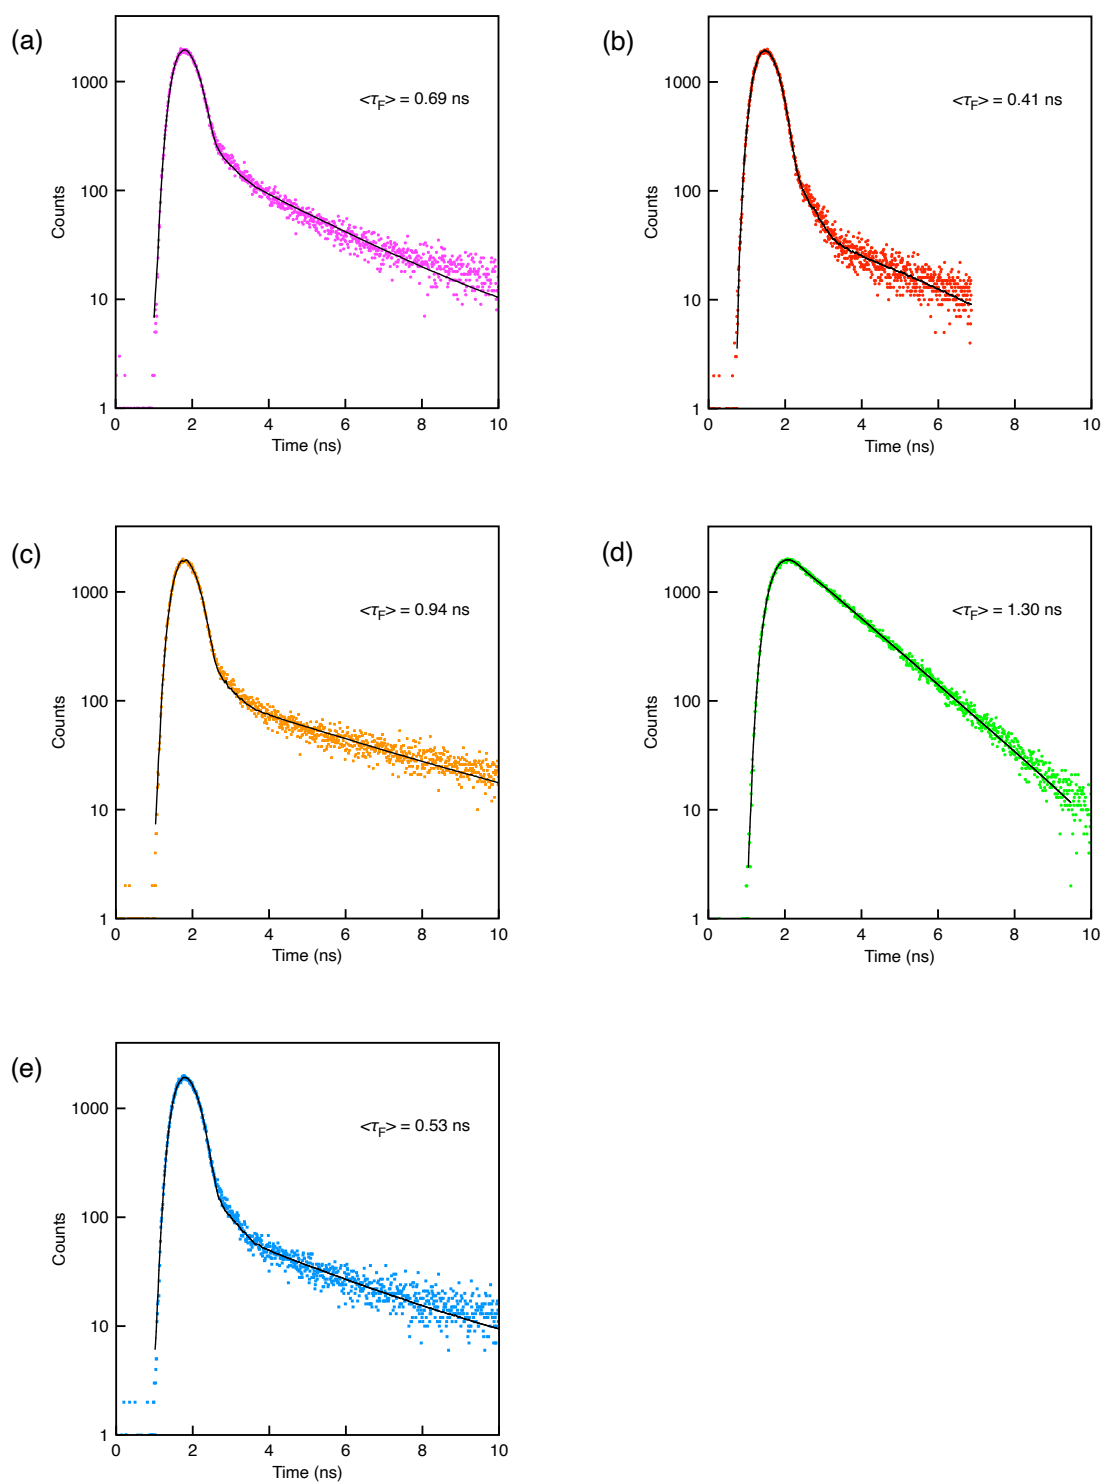

**Fig. S31** Fluorescence decay curves of (a) **1** ( $\tau_F = 0.69$  ns), (b) oligo(**1**) ( $\tau_F = 0.41$  ns), (c) oligo(**2-3a**) ( $\tau_F = 0.94$  ns), (d) oligo(**2-3b**) ( $\tau_F = 1.30$  ns) and (e) oligo(**2-3c**) ( $\tau_F = 0.53$  ns) excited at 405 nm monitored at 480 nm measured in  $\text{CHCl}_3$  ( $c = 1.5 \mu\text{M}$ ) under  $\text{N}_2$ .

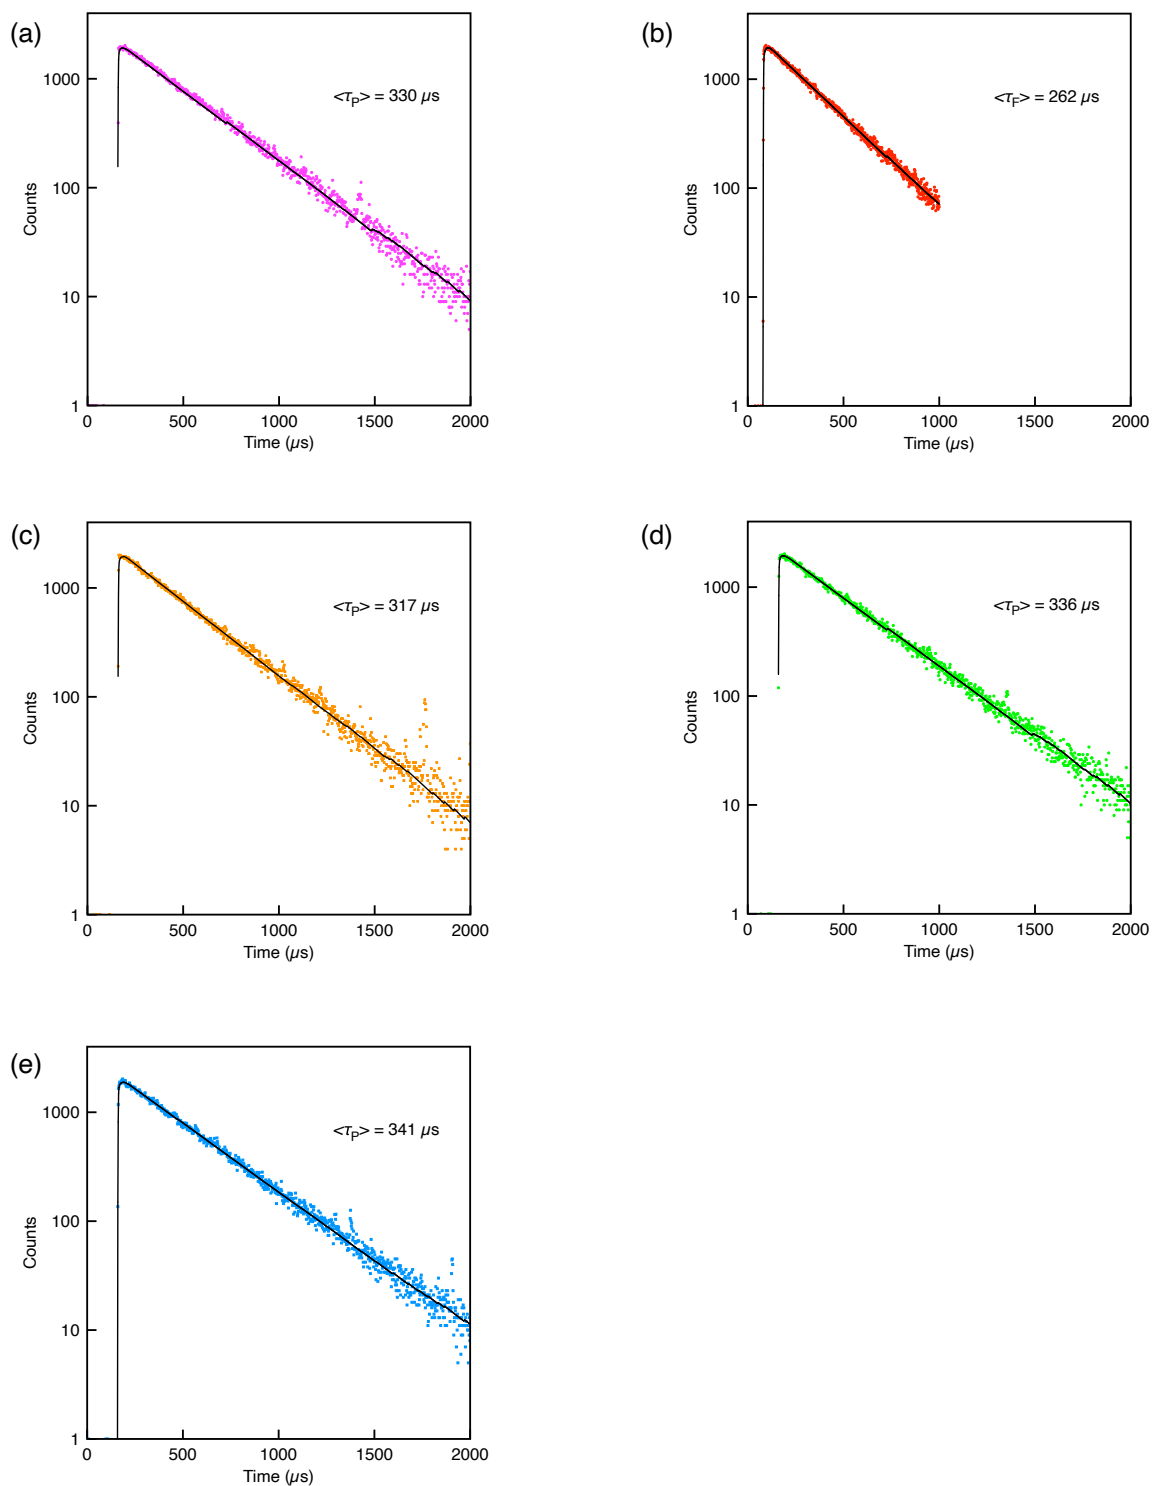

**Fig. S32** Phosphorescence decay curves of (a) **1** ( $\tau_P = 330 \mu s$ ), (b) oligo(**1**) ( $\tau_P = 262 \mu s$ ), (c) oligo(**2-3a**) ( $\tau_P = 317 \mu s$ ), (d) oligo(**2-3b**) ( $\tau_P = 336 \mu s$ ) and (e) oligo(**2-3c**) ( $\tau_P = 341 \mu s$ ) excited at 450 nm monitored at 640 nm measured in  $CHCl_3$  ( $c = 1.5 \mu M$ ) under  $N_2$ .



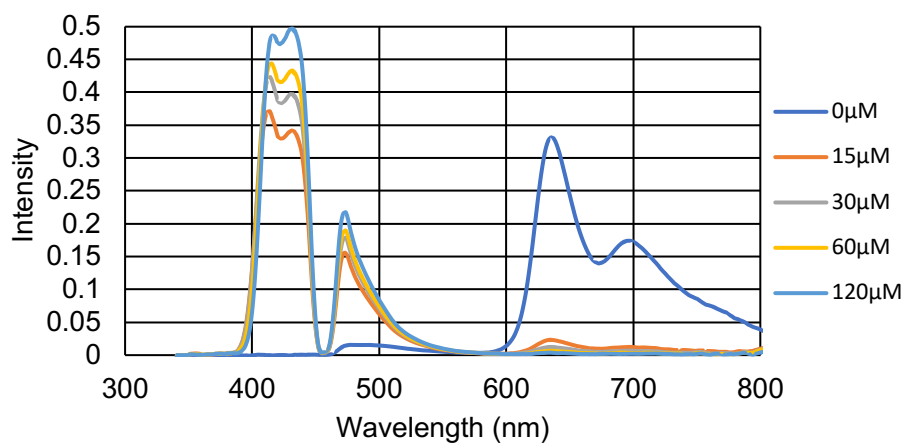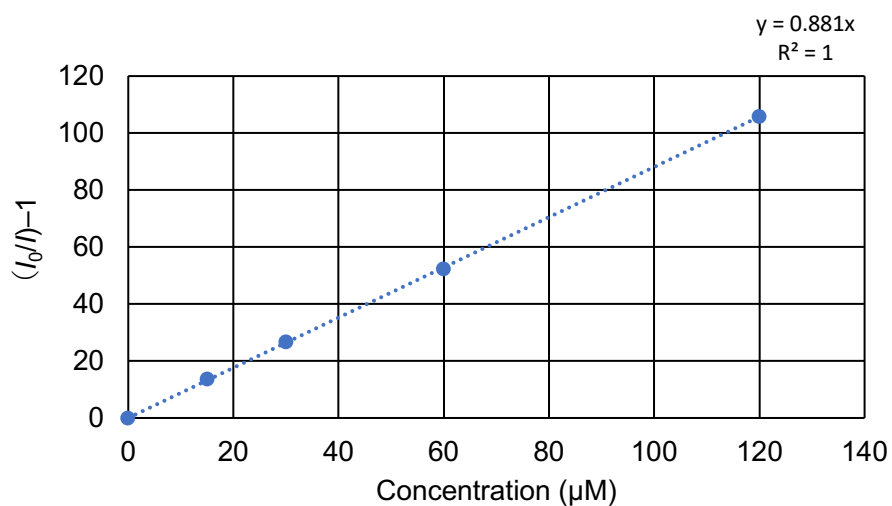

**Fig. S33.1** Emission spectra of **1** measured in  $\text{CHCl}_3$  at various concentrations in the presence of DPA excited at 450 nm under  $\text{N}_2$ , and the Stern-Volmer plots at 640 nm. The concentration of **1** was 5  $\mu\text{M}$ , and those of DPA were 0, 15, 30, 60 and 120  $\mu\text{M}$ .

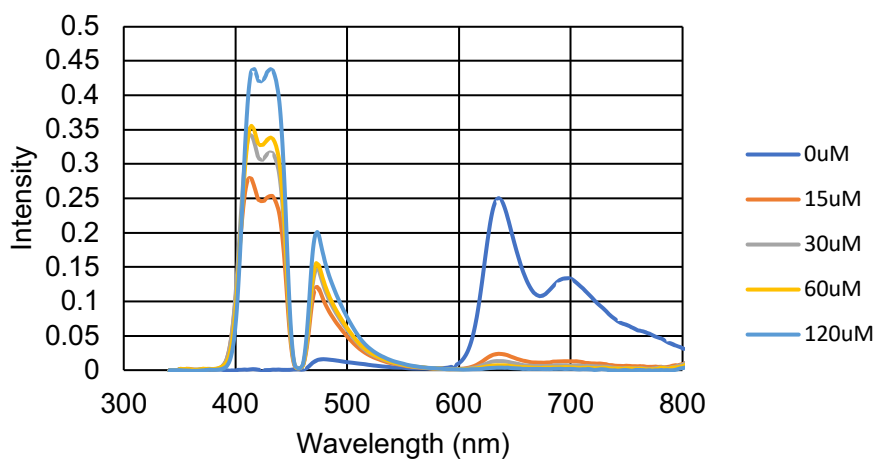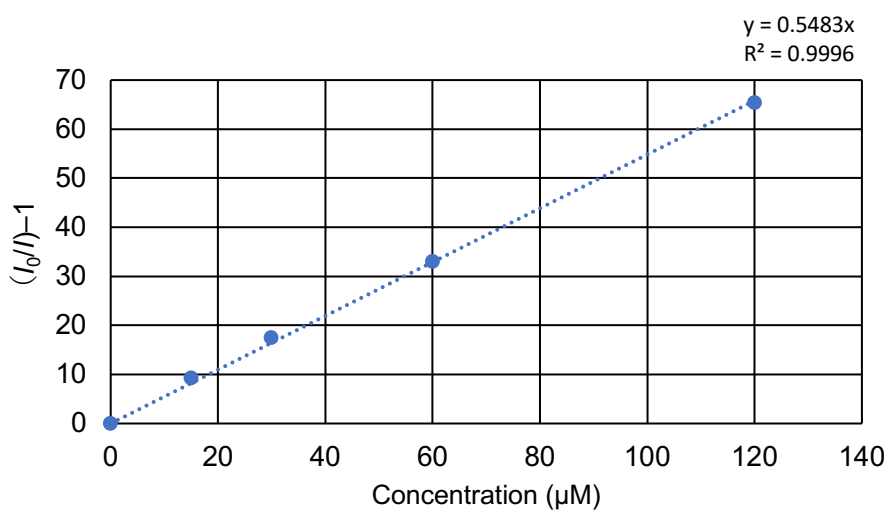

**Fig. S33.2** Emission spectra of oligo(1) measured in  $\text{CHCl}_3$  at various concentrations in the presence of DPA excited at 450 nm under  $\text{N}_2$ , and the Stern-Volmer plots at 640 nm. The concentration of oligo(1) was 5  $\mu\text{M}$ , and those of DPA were 0, 15, 30, 60 and 120  $\mu\text{M}$ .

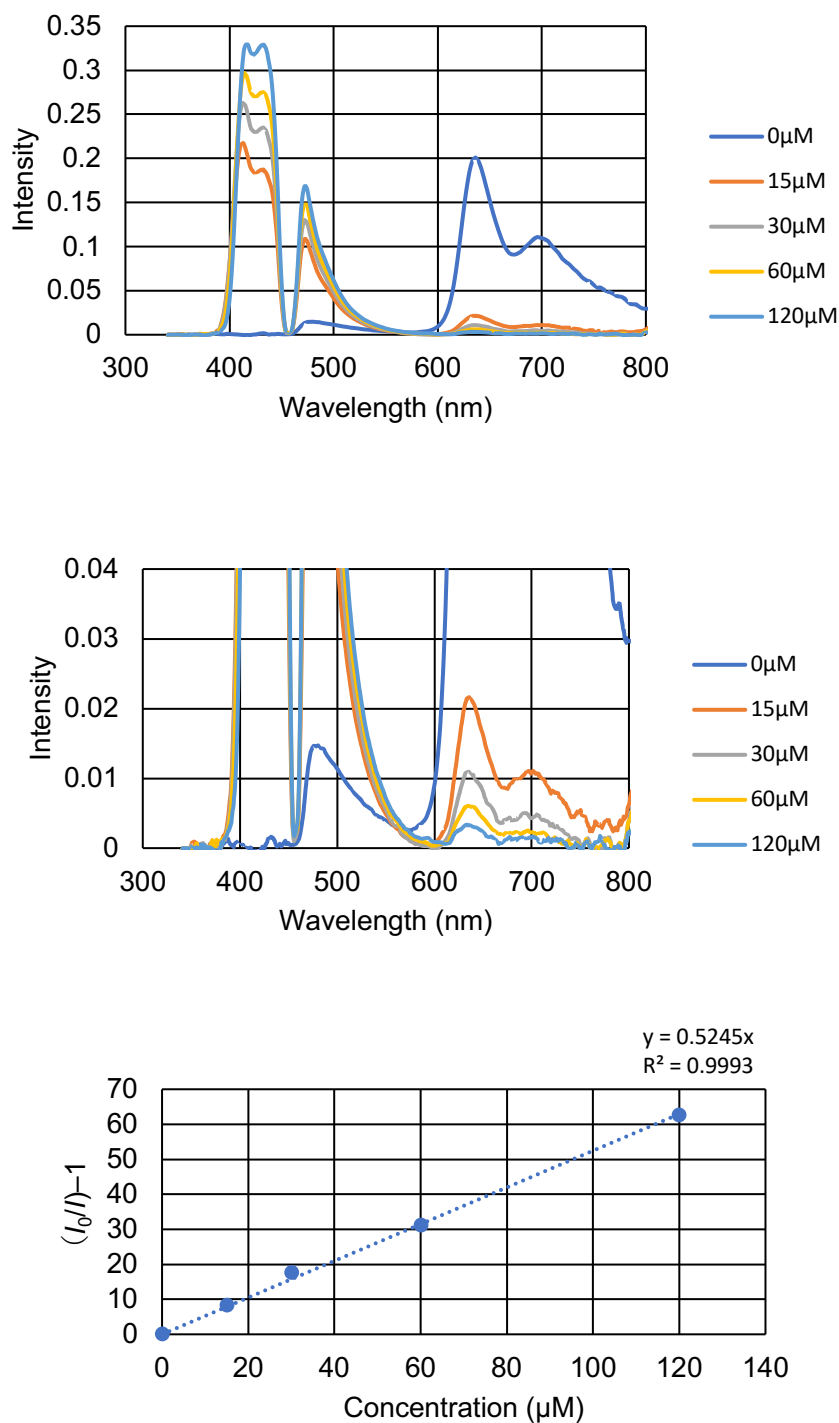

**Fig. S33.3** Emission spectra of oligo(2-3a) measured in CHCl<sub>3</sub> at various concentrations in the presence of DPA excited at 450 nm under N<sub>2</sub>, and the Stern-Volmer plots at 640 nm. The concentration of oligo(2-3a) was 5 μM, and those of DPA were 0, 15, 30, 60 and 120 μM.

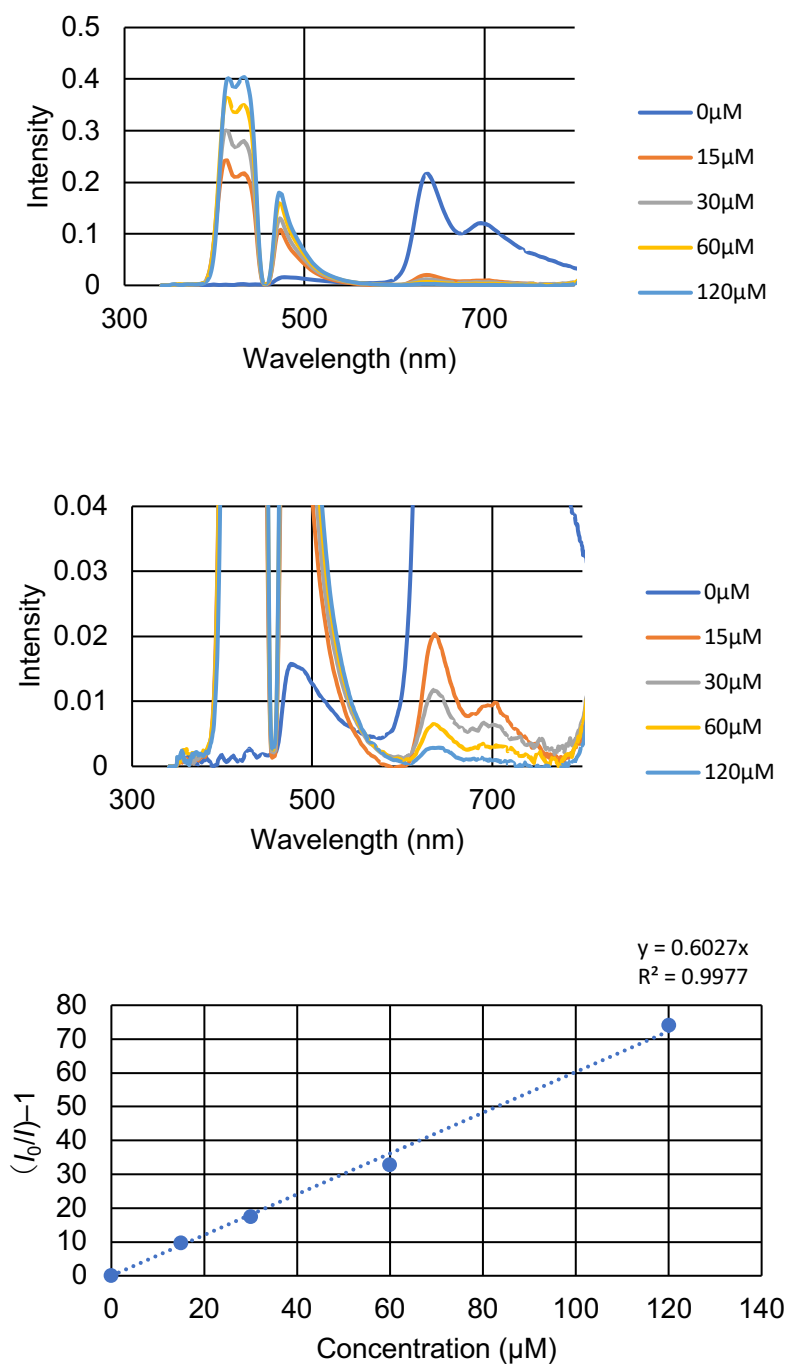

**Fig. S33.4** Emission spectra of oligo(2-3b) measured in CHCl<sub>3</sub> at various concentrations in the presence of DPA excited at 450 nm under N<sub>2</sub>, and the Stern-Volmer plots at 640 nm. The concentration of oligo(2-3b) was 5 μM, and those of DPA were 0, 15, 30, 60 and 120 μM.

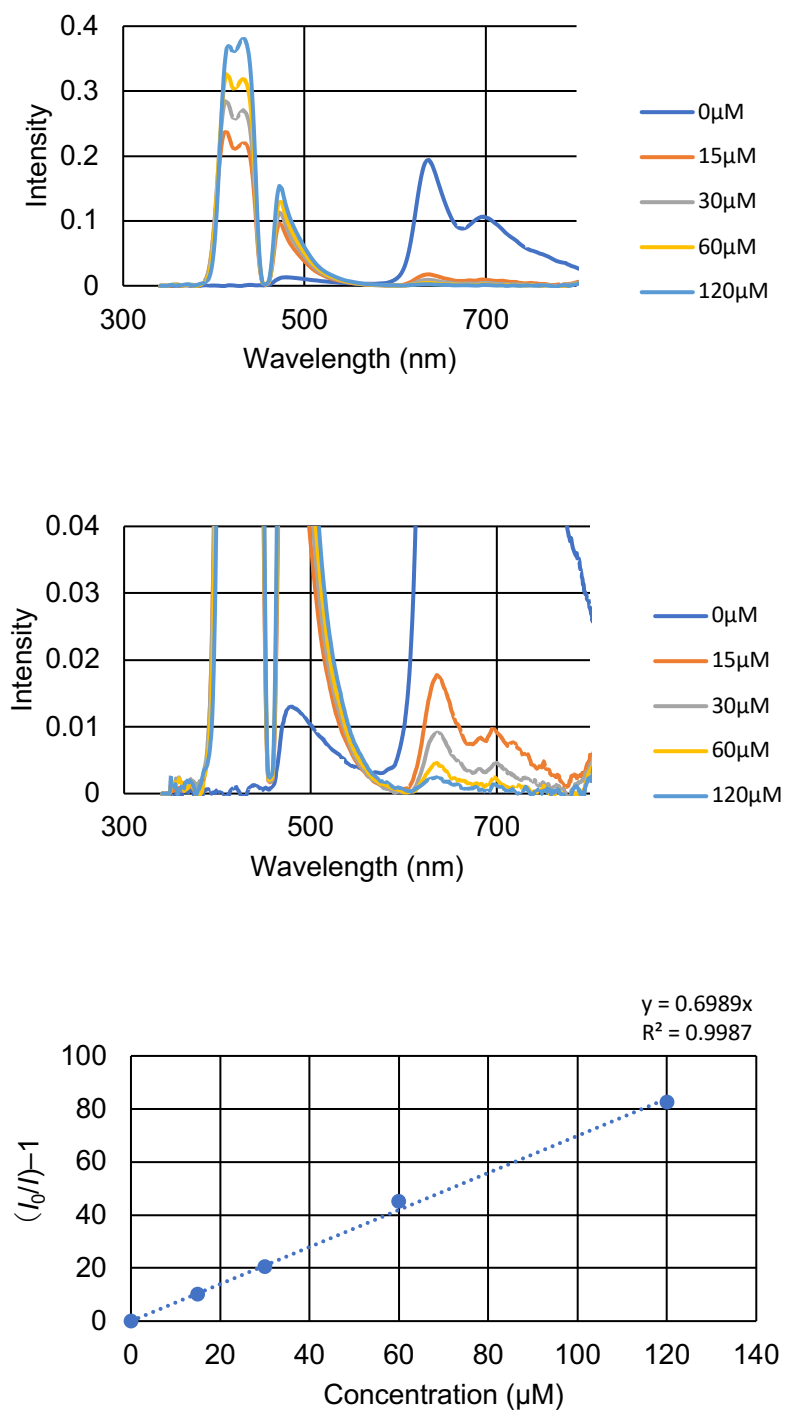

**Fig. S33.5** Emission spectra of oligo(2-3c) measured in CHCl<sub>3</sub> at various concentrations in the presence of DPA excited at 450 nm under N<sub>2</sub>, and the Stern-Volmer plots at 640 nm. The concentration of oligo(2-3c) was 5 μM, and those of DPA were 0, 15, 30, 60 and 120 μM.

## Simulated IR absorptions

The IR absorption spectra of N–H and N–C<sub>3</sub>H<sub>7</sub> models (Fig. S26) were simulated by DFT method using the  $\omega$ B97XD functional and 6-31G\* (C, H, N, O, P)-LANL2DZ (Pt) basis set to get information of IR absorptions assignable to two C=O stretching vibrations of cyclic imide moieties of **2** (Table S1). Prior to vibration calculation, the geometries were fully optimized using the same functional and basis set considering the effect of harmonic approximation.

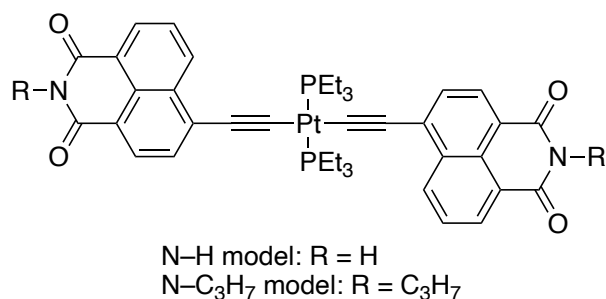

**Fig. S34.** Chemical structures of N–H and N–C<sub>3</sub>H<sub>7</sub> models.

**Table S1** IR absorptions of model compounds simulated by DFT method

| Compound                              | C=O stretching vibration (cm <sup>-1</sup> ) |               |
|---------------------------------------|----------------------------------------------|---------------|
|                                       | Symmetrical                                  | Unsymmetrical |
| N–H model                             | 1845                                         | 1841          |
| N–C <sub>3</sub> H <sub>7</sub> model | 1830                                         | 1795          |

## Thermal properties

The thermal stability of oligo(1) and oligo(2-3a)–oligo(2-3c) were analyzed by TGA and DSC as shown in Fig. S35 and listed in Table S2, respectively. All the oligomers did not lose weights at 50–300 °C. The 5% weight loss temperatures of oligo(2-3a)–oligo(2-3c) were 349–353 °C, which were higher than that of oligo(1) (338 °C). The weight residues at 500 °C of oligo(2-3a)–oligo(2-3c) were 79–81%, higher than that of oligo(1) (74%). The order of glass transition temperatures ( $T_g$ ) was oligo(1)  $\approx$  oligo(2-3c) < oligo(2-3b) < oligo(2-3a), which coincided with the chain length between Pt–acetylide complex moieties. Apparently, the presence of internal double bonds also affects the crystallinity,<sup>S4–S6</sup> closely related with thermal properties.

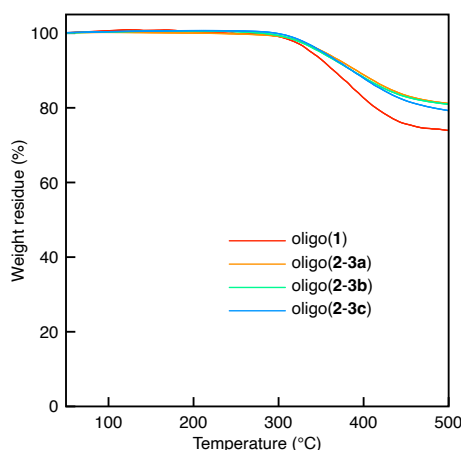

**Fig. S35** TGA traces of oligo(1) and oligo(2-3a)–oligo(2-3c) measured at a heating rate = 10 °C/min under N<sub>2</sub>.

**Table S2** TGA and DSC data of oligo(1) and oligo(2-3a)–oligo(2-3c)

| Oligomer    | $T_{d5}^a$ (°C) | $W_{500\text{ °C}}^b$ (%) | $T_g^c$ (°C) |
|-------------|-----------------|---------------------------|--------------|
| Oligo(1)    | 338             | 74                        | 116          |
| Oligo(2-3a) | 353             | 81                        | 182          |
| Oligo(2-3b) | 349             | 80                        | 176          |
| Oligo(2-3c) | 351             | 79                        | 119          |

<sup>a</sup> 5% weight loss temperature. <sup>b</sup> Weight residue at 500 °C. <sup>c</sup> Glass transition temperature.

## References

- S1) Y. Zhou, F. N. Castellano, T. W. Schmidt and K. Hanson, *ACS Energy Lett.*, 2020, **5**, 2322–2326. DOI: [10.1021/acsenergylett.0c01150](https://doi.org/10.1021/acsenergylett.0c01150)
- S2) M. Verma, V. Luxami and K. Paul, *RSC Adv.*, 2015, **5**, 41803–41813. DOI: [10.1039/C5RA00925A](https://doi.org/10.1039/C5RA00925A)
- S3) M. J. Frisch, G. W. Trucks, H. B. Schlegel, G. E. Scuseria, M. A. Robb, J. R. Cheeseman, G. Scalmani, V. Barone, G. A. Petersson, H. Nakatsuji, X. Li, M. Caricato, A. V. Marenich, J. Bloino, B. G. Janesko, R. Gomperts, B. Mennucci, H. P. Hratchian, J. V. Ortiz, A. F. Izmaylov, J. L. Sonnenberg, D. Williams-Young, F. Ding, F. Lipparini, F. Egidi, J. Goings, B. Peng, A. Petrone, T. Henderson, D. Ranasinghe, V. G. Zakrzewski, J. Gao, N. Rega, G. Zheng, W. Liang, M. Hada, M. Ehara, K. Toyota, R. Fukuda, J. Hasegawa, M. Ishida, T. Nakajima, Y. Honda, O. Kitao, H. Nakai, T. Vreven, K. Throssell, J. A. Montgomery, Jr., J. E. Peralta, F. Ogliaro, M. J. Bearpark, J. J. Heyd, E. N. Brothers, K. N. Kudin, V. N. Staroverov, T. A. Keith, R. Kobayashi, J. Normand, K. Raghavachari, A. P. Rendell, J. C. Burant, S. S. Iyengar, J. Tomasi, M. Cossi, J. M. Millam, M. Klene, C. Adamo, R. Cammi, J. W. Ochterski, R. L. Martin, K. Morokuma, O. Farkas, J. B. Foresman and D. J. Fox, Gaussian, Inc., Wallingford CT, 2016.
- S4) J. E. O’Gara, K. B. Wagener and S. F. Hahn, *Makromol. Chem., Rapid Commun.*, 1993, **14**, 657–662. DOI: [10.1002/marc.1993.030141006](https://doi.org/10.1002/marc.1993.030141006)
- S5) E. B. Berda, T. W. Baughman and K. B. Wagener, *J. Polym. Sci., Part A: Polym. Chem.*, 2006, **44**, 4981–4989. DOI: [10.1002/pola.21603](https://doi.org/10.1002/pola.21603)
- S6) G. Rojas, E. B. Berda and K. B. Wagener, *Polymer*, 2008, **49**, 2985–2995. DOI: [10.1016/j.polymer.2008.03.029](https://doi.org/10.1016/j.polymer.2008.03.029)
